# Supplementary material for: I had to leave. I had to leave my clinic, my city, leave everything behind in Syria. Qualitative research of Syrian healthcare workers migrating from the war-torn country
Source: PubMed Central journal article supplement — BMJ Open. 2021 Nov 3;11(11):e049941. doi: 10.1136/bmjopen-2021-049941 (PMC8572379; doi:10.1136/bmjopen-2021-049941), 2021-11-03
Supplement: bmjopen-2021-049941.draft_revisions.pdf [file bmjopen-2021-049941.draft_revisions.pdf]

# BMJ Open

BMJ Open is committed to open peer review. As part of this commitment we make the peer review history of every article we publish publicly available.

When an article is published we post the peer reviewers' comments and the authors' responses online. We also post the versions of the paper that were used during peer review. These are the versions that the peer review comments apply to.

The versions of the paper that follow are the versions that were submitted during the peer review process. They are not the versions of record or the final published versions. They should not be cited or distributed as the published version of this manuscript.

BMJ Open is an open access journal and the full, final, typeset and author-corrected version of record of the manuscript is available on our site with no access controls, subscription charges or pay-per-view fees (<http://bmjopen.bmj.com>).

If you have any questions on BMJ Open's open peer review process please email [info.bmjopen@bmj.com](mailto:info.bmjopen@bmj.com)

# BMJ Open

**"I had to leave. I had to leave my clinic, my city, leave everything behind in Syria"**  
**Qualitative research of Syrian health care workers migrating from the war-torn country**

|                               |                                                                                                                                                                                                                                                                                                                                                            |
|-------------------------------|------------------------------------------------------------------------------------------------------------------------------------------------------------------------------------------------------------------------------------------------------------------------------------------------------------------------------------------------------------|
| Journal:                      | <i>BMJ Open</i>                                                                                                                                                                                                                                                                                                                                            |
| Manuscript ID                 | bmjopen-2021-049941                                                                                                                                                                                                                                                                                                                                        |
| Article Type:                 | Original research                                                                                                                                                                                                                                                                                                                                          |
| Date Submitted by the Author: | 26-Feb-2021                                                                                                                                                                                                                                                                                                                                                |
| Complete List of Authors:     | Kallström, Agneta; University of Eastern Finland Faculty of Health Sciences,<br>al-Abdulla, Orwa; University of Eastern Finland Faculty of Health Sciences<br>Parkki, Jan<br>Häkkinen, Mikko; Laurea University of Applied Sciences<br>Juusola, Hannu; University of Helsinki<br>Kauhanen, Jussi; University of Eastern Finland Faculty of Health Sciences |
| Keywords:                     | ETHICS (see Medical Ethics), HEALTH SERVICES ADMINISTRATION & MANAGEMENT, Health & safety < HEALTH SERVICES ADMINISTRATION & MANAGEMENT, Human resource management < HEALTH SERVICES ADMINISTRATION & MANAGEMENT, MEDICAL ETHICS                                                                                                                           |
|                               |                                                                                                                                                                                                                                                                                                                                                            |

SCHOLARONE™  
Manuscripts

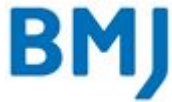

I, the Submitting Author has the right to grant and does grant on behalf of all authors of the Work (as defined in the below author licence), an exclusive licence and/or a non-exclusive licence for contributions from authors who are: i) UK Crown employees; ii) where BMJ has agreed a CC-BY licence shall apply, and/or iii) in accordance with the terms applicable for US Federal Government officers or employees acting as part of their official duties; on a worldwide, perpetual, irrevocable, royalty-free basis to BMJ Publishing Group Ltd ("BMJ") its licensees and where the relevant Journal is co-owned by BMJ to the co-owners of the Journal, to publish the Work in this journal and any other BMJ products and to exploit all rights, as set out in our [licence](#).

The Submitting Author accepts and understands that any supply made under these terms is made by BMJ to the Submitting Author unless you are acting as an employee on behalf of your employer or a postgraduate student of an affiliated institution which is paying any applicable article publishing charge ("APC") for Open Access articles. Where the Submitting Author wishes to make the Work available on an Open Access basis (and intends to pay the relevant APC), the terms of reuse of such Open Access shall be governed by a Creative Commons licence – details of these licences and which [Creative Commons](#) licence will apply to this Work are set out in our licence referred to above.

Other than as permitted in any relevant BMJ Author's Self Archiving Policies, I confirm this Work has not been accepted for publication elsewhere, is not being considered for publication elsewhere and does not duplicate material already published. I confirm all authors consent to publication of this Work and authorise the granting of this licence.

1  
2  
3 1 *I had to leave. I had to leave my clinic, my city, leave everything behind in Syria*

4  
5 2 Qualitative research of Syrian health care workers migrating from the war-torn country

6  
7 3  
8  
9 4 Corresponding author: Kallström, Agneta, (MA) The University of Eastern Finland. Faculty of Health  
10 5 Sciences. P.O. box 1627. FI-70211 Kuopio, Finland. agneta.kallstrom@helsinki.fi

11 6  
12 7 Al Abdulla Orwa, (DMD, MPH) The University of Eastern Finland. Faculty of Health Sciences

13 8 Parkki Jan, (MD, M.Sc.) Independent researcher

14 9 Häkkinen, Mikko (PhD.), The Laurea University of Applied Sciences

15 10 Juusola, Hannu, (PhD.) The University of Helsinki, Faculty of Arts, Middle Eastern Studies

16 11 Kauhanen Jussi, (MD, MPH, PhD), The University of Eastern Finland. Faculty of Health Sciences.

17 12

18 13

19 14  
20 15  
21 16  
22 17  
23 18  
24 19  
25 20  
26 21  
27 22  
28 23  
29 24  
30 25  
31 26  
32 27  
33 28  
34 29  
35 30  
36 31  
37 32  
38 33  
39 34  
40 35  
41 36  
42 37  
43 38  
44 39  
45 40  
46 41  
47 42  
48 43  
49 44  
50 45  
51 46  
52 47  
53 48  
54 49  
55 50  
56 51  
57 52  
58 53  
59 54  
60 55

13 **ABSTRACT**

14 **Objectives** To explore the experiences of Syrian health care workers of violence since 2011 and  
15 reasons behind migration from the conflict-affected country

16 **Design** A qualitative study using semi-structured interviews and inductive content analysis.  
17 Interviews were conducted in Turkey and Europe in 2016 - 2017.

18 **Setting** Interviewees were Syrian health care workers who had been working in the country after the  
19 conflict started in 2011, but at some point, migrated from Syria to Turkey or Europe.

20 **Participants** We studied data from 20 semi-structured in-depth interviews collected with a snowball  
21 sampling method.

22 **Results** Our findings show that health care workers migrated from Syria only because of security  
23 concerns. In most cases, the decision to leave was a result of the generalised violence by different  
24 warring parties. Targeted attacks against health care was one of the main reasons for leaving. Some  
25 participants had a specific notable trigger event before they left; such as a colleague being detained  
26 or killed. Many just grew tired of living under constant threat and fear, with their families also at risk.

27 **Conclusions** This research adds to the body of literature on violence in Syria. It helps to understand  
28 the reasons why health care workers, even though realising that it will leave their population without  
29 proper health care provision, nevertheless decide to flee the country. Understanding the motives of  
30 the health care workers will help to find new ways to protect them.

31 **Keywords:** Syria, ISIS, health care worker, conflict, violence, migration, reasons, qualitative

1  
2  
3  
4  
5  
6  
7  
8  
9  
10  
11  
12  
13  
14  
15  
16  
17  
18  
19  
20  
21  
22  
23  
24  
25  
26  
27  
28  
29  
30  
31  
32  
33  
34  
35  
36  
37  
38  
39  
40  
41  
42  
43  
44  
45  
46  
47  
48  
49  
50  
51  
52  
53  
54  
55  
56  
57  
58  
59  
60

### 33 STRENGTHS AND LIMITATIONS OF THIS STUDY

34

- 35 • This qualitative semi-structured study gives a voice to Syrian health care workers. This  
36 research gives them an opportunity to share their experiences of the conflict and the reasons  
37 why health care workers migrate from Syria.
- 38 • Violence-related information is difficult to obtain. Victims are potentially traumatized and  
39 unwilling to talk. The interviews were conducted with assistance of Syrian health care  
40 professionals using snowball sampling method. These approaches provided us with unique  
41 access to information.
- 42 • Through understanding the motivations of health care workers leaving their country,  
43 productive interference in future conflicts may become possible. If the health care workers  
44 can be better protected, the impact on local health care system and public health could  
45 potentially be diminished.
- 46 • Although interviews consisted of a relatively small sample in numbers of interviews, the data  
47 reached the saturation point.
- 48 • Most of the participant were residing in Turkey and were mainly limited to male physicians.  
49 No participants working on the Government of Syrian were reached. Their insights would  
50 most likely have been significantly different thus greatly adding to the totality of this study.

51

52

## 53 INTRODUCTION

54 Armed conflicts challenge normal health care provision. Health care workers (HCWs), one of the  
55 most crucial factors of health care services, often migrate away from conflict-affected areas.[1–3] In  
56 2019, at least 151 HCWs in 17 countries were killed and 502 injured.[4] Notably, attacks against  
57 health care took place during the events known as the Arab Spring, a revolutionary wave of  
58 demonstrations and protests starting in 2010 from Tunisia. Anti-government demonstrations  
59 escalated into violence in several states around the Middle East. In Syria, the events turned into an  
60 armed conflict that is still ongoing. Especially in Syria, Bahrain, Yemen and Iraq, the HCWs has been  
61 targeted since the start of the Arab Spring.[5–7]

62 During the decade of war, hospital bombings have become a trademark in the Syrian conflict.  
63 Violence against health care and thus denying the provision of health care to the population has been  
64 used as a strategy of war[7] even though the International Humanitarian Law (IHL) stipulates that the  
65 health care system is protected in time of war. The government must protect health care workers'  
66 medical neutrality, which means freedom for the HCWs to take care of patients regardless of their  
67 political affiliations[8]. From the beginning of the conflict, the Government of Syria (GoS) is reported  
68 to punish HCWs for treating injured protestors[9,10] regardless of the IHL statute that *under no*  
69 *circumstances shall any person be punished for carrying out medical activities compatible with*  
70 *medical ethics, regardless of the person benefiting from them.*[11] In 2012 the GoS effectively  
71 criminalised health care provision to people belonging to the opposition.[10,12]

72 At least 923 HCWs have been killed in Syria from 2011 through March 2020. All warring parties  
73 have attacked health care; however, the GoS with Russia has been held responsible for 91 per cent of  
74 deaths of HCWs. Non-state armed groups (NSAGs), Islamic State in Iraq and Syria (ISIS), Kurdish  
75 or unidentified forces are responsible for 9 per cent. The primary cause of death (55%) is aerial or  
76 ground bombardment. HCWs have also died when detained and tortured, or just executed.[4,13,14]  
77 More than 70 % of qualified HCWs have left the country, in some areas, specific specialities are  
78 totally absent.[15,16] Also, medical students have had to leave their basic and specialisation  
79 studies.[17] The absence of professionals will add to the challenges of both current and future  
80 treatment of the population.

81 HCWs, especially physicians, tend to migrate at the early stage of the conflict because they have  
82 resources to leave.[18] The financial issues and training concerns predict HCWs migration. Also,  
83 generalised insecurity, targeted violence and protecting family is a known reason to go.[19,20] In

1  
2  
3 84 Iraq, a country that has experienced perpetual violence for decades, male physicians over 30 years of  
4  
5 85 age face a significantly increased risk of being kidnapped or assassinated. However, factors  
6  
7 86 demoralising the HCWs are complex, and the decision to leave is made based on a sum of reasons.  
8  
9 87 [1,21]

10 88  
11  
12 89 Most analyses of violence against health care in Syria have focused on damage to health care  
13  
14 90 infrastructures, such as hospitals and ambulances.[22–24] Few studies have looked at HCWs  
15  
16 91 personal experiences in conflicts[15,25], and none of them examines the reasons for professionals  
17  
18 92 leaving Syria. Also, current reviews do not take into account how the violence by different warring  
19  
20 93 parties, such as arrests, detention and kidnappings, affect the decision to leave to protect their own  
21  
22 94 life and family members. Mainly missing is data on secondary trauma, such as witnessing killings of  
23  
24 95 civilians and colleagues, as well as how the constant fear of the conflict itself affects the outward  
25  
26 96 mobility of health care professionals.

27 97 Many studies focus on the staff departing less developed countries for economic reasons, or due to  
28  
29 98 inadequate quality health care.[21,26] Still, there is a relative lack of studies on healthcare-related  
30  
31 99 migration in conflict settings.

32 100 Doocy et al. [27] showed that fleeing from Iraq was associated with a violent event in 61 per cent of  
33  
34 101 cases. The physicians who left the country, a total of 75 per cent had experienced violence against  
35  
36 102 their household before the decision to leave. In another study by Al-Khalisi [28], 60 per cent of  
37  
38 103 participants had left Iraq for security reasons.

39 104 Violence in Iraq has differed from that in Syria with almost no airstrikes against health care facilities  
40  
41 105 there. On the contrary, Fouad et al. [7] have argued that the bombing of hospitals is part of the  
42  
43 106 weaponisation of health care, a strategy of war, by the Government of Syria (GoS).

44  
45 107

## 48 108 **METHODS**

49  
50  
51 109 In this research, we studied HCWs who have migrated from Syria and reside abroad. We aimed to  
52  
53 110 explore their experiences of the ongoing conflict. We wanted to understand the reasons for them to  
54  
55 111 leave their home country after the conflict started in 2011.

### 57 112 **Study population**

1  
2  
3 113 The qualitative study is based on semi-structured interviews ( $n=20$ ) of Syrian HCWs who have left  
4  
5 114 the country since 2011. Interviews ( $n=17$ ) were conducted in Gaziantep, a Turkish municipality  
6  
7 115 adjacent to the Syrian border where participants resided at the time of interviews in June – July 2016  
8  
9 116 and early 2017. Additional interviews ( $n=3$ ) were conducted in Europe from late 2016 to early 2017.  
10 117 Altogether, participants consisted of 18 males and two females.  
11

12  
13 118 The age of participants ranged from 26 to 47 years. Mean age was 36 years. Most of the participants  
14  
15 119 were born in Aleppo governorate ( $n = 12$ ). The other participants represented a variety of other Syrian  
16  
17 120 provinces. Most of the participants were married and had at least one child.  
18

19 121 Majority of interviewed ( $n = 14$ ) were physicians with post-graduate speciality  $n = 9$ , surgery and  
20  
21 122 paediatrics were most typical). Also, other health care professionals, such as nurse (1), pharmacists  
22  
23 123 (3) health service manager (1) and dentist (1) were interviewed. All interviewed had worked in Syria  
24  
25 124 during the conflict at some point. The working experience varied from almost none to over 20 years.  
26

27 125 One of the participants was a medical student, and few general practitioners were residents in  
28  
29 126 speciality training. They all had to suspend their studies because of the violence and leaving Syria.  
30

### 31 32 127 **Study design and sampling**

33  
34  
35 128 The participants were identified using a snowball sampling method (SSM), and they had to represent  
36  
37 129 the category of health care workers in the International Labor Organization's International Standards  
38  
39 130 Classification of The Occupations (ISCO-08).[29] SSM was chosen to increase trust in the research  
40  
41 131 that could be very sensitive. [30] The first participant of the chain was contacted via email. He was  
42  
43 132 a Syrian health care professional living in Turkey, Gaziantep. One female (AK) and two male (MH,  
44  
45 133 OA) researchers conducted the interviews in English or Arabic. The participants selected a suitable  
46  
47 134 place for the interviews and only the researchers and the participant were present at the time. The  
48  
49 135 participants were explained the aim and goals of the study. They named another 1-3 candidates that  
50  
51 136 might be interested to participate the research. Volunteers among them contacted our research team.  
52

53 137  
54 138 The duration of the interviews varied from 45 minutes to nearly 90 minutes. Each interview was  
55  
56 139 terminated, when further inquiry provided no significant new themes.  
57

### 58 140 **Measurement and analysis**

59  
60



1  
2  
3  
4  
5  
6  
7  
8  
9  
10  
11  
12  
13  
14  
15  
16  
17  
18  
19  
20  
21  
22  
23  
24  
25  
26  
27  
28  
29  
30  
31  
32  
33  
34  
35  
36  
37  
38  
39  
40  
41  
42  
43  
44  
45  
46  
47  
48  
49  
50  
51  
52  
53  
54  
55  
56  
57  
58  
59  
60

141 A semi-structured interview guided the discussion with the participants. The study was focused on  
142 HCWs experiences of violence in Syria and reasons for migration from the country after 2011. The  
143 violence was defined in the study as "*the intentional use of physical force or power, threatened or*  
144 *actual, against oneself, another person, or against a group or community, that either results in or*  
145 *has a high likelihood of resulting in injury, death, psychological harm, maldevelopment or*  
146 *deprivation.*[31] We focused in this study health care workers' experiences of violence. The attacks  
147 against health care were understood here as *an attack on health care as any act of verbal or physical*  
148 *violence or obstruction or threat of violence that interferes with the availability, access and delivery*  
149 *of curative and/or preventive health services during emergencies.*[32]

151 After the interviews were transcribed verbatim and triangulated with hand-written notes, the  
152 transcripts were read through. Using inductive content data analysis, answers were coded (AK and  
153 OA) into categories using the Excel program. The categories based on experiences which indicated  
154 motivational factors for leaving the country. These factors were sought both from the direct answers  
155 to structured questions, but also from all of the free form replies. These were then classified into  
156 thematically unified sub-groups, no previously set system for such division was used, but the  
157 classification emerged organically from the population of factors introduced by the interviewees.

159 The quotations were used to illustrate the themes and findings, but also to provide an authentic voice  
160 to the participants.

### 161 **Ethical approval**

162 The interviews were recorded with permission of the participants, and consent was obtained verbally.  
163 Anonymity and confidentiality were bestowed. Participants were informed about the aim and  
164 purpose of the research and background of the researchers. Participants had an opportunity to ask  
165 questions concerning the research. They were noticed that they are allowed to interrupt or abandon  
166 the interview if wanted.

167 An ethical permit for the study was applied for and obtained from the University of Eastern Finland  
168 Committee on Research Ethics. The principles in the Declaration of Helsinki were observed in all  
169 stages of the study.

### 170 **Patient and public involvement**

1  
2  
3 171 No patients or members of the general public were involved in the conduct of this research.  
4  
5  
6 172

7  
8 173 **RESULTS**  
9  
10

11 174 Reasons for leaving Syria were all related to violence that started after the demonstrations against the  
12 regime in 2011. The HCWs suffered either from general strain under the violent environment, be  
13 175 targeted by several specific violations or both. All participants expressed that their profession was the  
14 176 reason for targeting. The relative impact of these different forms of insults is further discussed in the  
15 177 conclusions part of the study.  
16 178

17 179 The participants have gradually migrated during the conflict. Some left early when the violence  
18 180 started in 2011- 2012, some later as the war escalated. While some moved to opposition controlled  
19 181 Eastern Aleppo, some moved directly to Turkey. Then many of those who remained initially in  
20 182 Eastern Aleppo followed. Some migrated to Lebanon due for geographical reasons. Once outside  
21 183 Syria, some HCWs continued to Europe to seek asylum.  
22  
23  
24  
25  
26  
27  
28  
29

30  
31 184 **Generalised violence**  
32

33 185 When demonstrations escalated, and violence spread after 2011, the participants considered this as  
34 186 one of the turning points in their life. They described their experiences and feelings widely about  
35 187 what they had witnessed. They had seen atrocities against civilians, including their family and friends.  
36 188 People had been arbitrarily arrested and disappeared.  
37  
38  
39  
40

41 189 *My friends were arrested in front of me. They were beaten, tortured in the streets. I saw these*  
42 190 *incidents. Everyone in Syria saw this. [The GoS was] killing people and shooting. Using tear gas,*  
43 191 *live bullets. (general practitioner, male)*  
44

45 192 Before the territorial division between different warring factions, especially parting of NSAGs-  
46 193 controlled Eastern and GoS controlled Western side of Aleppo, had properly formed, the participants  
47 194 had regularly commuted through GoS checkpoints. The atmosphere had become oppressive. Constant  
48 195 check-ups, arbitrary decisions, such as detaining, by the GoS and increasing threat of violence caused  
49 196 widespread psychological stress among the participants.  
50  
51  
52

53 197 *This fear of daily violence caused stress and anxious feelings. I could not sleep. I was very afraid. I*  
54 198 *decided to stop working. The reason for this was that I was stopped and bullied at the military*  
55  
56  
57  
58  
59  
60

1

2

3 199 *checkpoint. I was asked ID card. All kinds of questions: "what you are doing in this city that is not*  
4 *your hometown and where does your family live". They just wanted to bully me. Fear of being*  
5 200 *detained was the reason I left Syria. (pharmacists, female)*  
6  
7 201

8

9 202 A participant told that the situation became impossible for GoS to control. This resulting power  
10 vacuum gave NSAGs room to operate. Some participants expressed their mistrust of these  
11 203 organisations and couldn't expect any help from the dwindling GoS force.  
12 204

14

15 205 As the conflict evolved, participants witnessed barrel bombs, chemical attacks and airstrikes against  
16 civilians. They were not spared from these attacks.  
17 206

18

19  
20 207 *I saw more than fifteen burnt Kurds, not far from the health care [centre]. Russian airstrike. Their*  
21 *relatives came. They didn't [recognised them] because the bodies were burned. Disgusting.*  
22 208  
23 209 (speciality doctor, male)

24

25  
26 210 Other warring parties, mostly ISIS and NSAGs, conducted violence against civilians according to  
27 participants. While GoS was considered the main perpetrator, ISIS and other NSAGs, such as Free  
28 211 Syrian Army (FSA) and Jabhat al-Nusra threatened, mistreated, abducted and killed people.  
29 212

31

32 213 *FSA took one nurse, tortured him for five hours. Then he died. Just because his name was the same*  
33 *as some else's. (speciality doctor, male)*  
34 214

35

36  
37 215 ISIS-inspired both fear and animosity against its ideology and values in the participants. The  
38 participant told unnerving anecdotes of the organisation that were circulating and creating an  
39 216 oppressive atmosphere of insecurity. Participants described their friends had severe problems with  
40 217 the organisation. Some of the participants decided to go to Turkey when they noticed ISIS advancing  
41 toward the city of Kobane, Aleppo governorate in northern east Syria. They believed fleeing from the  
42 218 organisation was their only option.  
43 219  
44 220

46

47  
48 221 *One of my friends was kidnapped. The siege became more intensive. I knew that something is going*  
49 *to happen. When Kobane was besieged [by ISIS], I left for Turkey. I had to. (nurse, male)*  
50 222

51

52 223 Some interviewees didn't indicate a single reason for them leaving, but instead said they succumbed  
53 under the constant stress, fear and harassment because of the escalating situation.  
54 224

55

56

57 225 **Violence related to personal issues**

58

59

60

1  
2  
3  
4  
5  
6  
7  
8  
9  
10  
11  
12  
13  
14  
15  
16  
17  
18  
19  
20  
21  
22  
23  
24  
25  
26  
27  
28  
29  
30  
31  
32  
33  
34  
35  
36  
37  
38  
39  
40  
41  
42  
43  
44  
45  
46  
47  
48  
49  
50  
51  
52  
53  
54  
55  
56  
57  
58  
59  
60

226 While participants were concerned about the generalised violence, their own and their families' safety  
227 played an important role when they decided to leave Syria. When violence spread, many participants  
228 wanted to take their families into Turkey before fighting would reach their homes. Many noted that  
229 they wanted to keep their children safe, and in Syria, it was impossible.

230 *I cannot live with my children under these circumstances. I saw what happened in Homs. I saw what*  
231 *happened in Deraa...using guns and aeroplanes... I felt this will happen in my area. This happened*  
232 *for 2-3 days [after leaving] my home. (health service manager, male)*

233 If a family member was arrested, all were investigated. Any suspected anti-government views or  
234 actions could lead to family-wide punishments, according to participants.

235 *After the second time detention [by GoS] my family said: "Leave the country now". I left. My family*  
236 *was afraid that I will go to jail again. Four days after I had left, they took my brother and told him*  
237 *"Tell your brother that if we catch him"...* (speciality doctor, male)

238 In many cases, the interviewed man was the breadwinner of the family. They were concerned about  
239 the financial well-being of their family, should they die. One participant mentioned that without a  
240 wife and children, he would most likely live and work in Syria.

241 *Family is depended on me. Their existence is depending on me and my surviving. I don't want to*  
242 *cause them danger or die as a martyr, and they lost me. It would be my family that would pay the*  
243 *high price. (speciality doctor, male)*

244 Some male participants expressed the fear of being conscripted in the Syrian forces. Many  
245 participants had witnessed atrocities performed by the GoS, and some had even been detained and  
246 tortured. They wanted to avoid becoming part of the military forces, and the only option was to leave.

247 *We had to go. I knew that they [the GoS] were after me. I had to leave my studies and leave. I should*  
248 *have gone to the army. That's why the regime was after me. (speciality doctor, male)*

249 Becoming remarked by ISIS for expressing opposing sentiments or antagonising them in any way  
250 was highly dangerous. Those who had fallen in their disfavour had little option. They had to leave  
251 because of being arrested or even executed.

1

2

3 252 *We were talking about ISIS; that they are not from Syria and we are not accepting their presence*  
4  
5 253 *here etc. Later my friends told me that ISIS is observing my home. I moved to another area. After this*  
6  
7 254 *incidence, one of them [friends] was arrested by ISIS. (specialist doctor, male)*

8

9 255 Although the participants were not explicitly asked for their ethnic background because of the  
10  
11 256 sensitivity, several them brought up their Kurdish roots, the minority in Syria. These Kurdish  
12  
13 257 participants felt that the conflict had caused them to become targeted explicitly by radical Sunni  
14  
15 258 Muslim NSAGs because of their background.

16

### 17 259 **Violence related to being a health care worker**

18

19

20 260 Most of the participants had personally experienced violence that they considered to be connected  
21  
22 261 with their profession. All thought that their profession made them as a target. Participants described  
23  
24 262 their experiences widely since 2011. The violence included verbal assaults, beatings, detaining and  
25  
26 263 torturing. They had been shot at or been in an ambulance when assaulted. Some described the situation  
27  
28 264 when they had been in a health care facility in the time of the aerial bombardments by GoS, and later  
29  
30 265 by Russia.

30

31

32 266 *This [name retracted] hospital was targeted by a Russian airstrike. One of my friends died in this*  
33  
34 267 *airstrike, the doctor [name retracted]. I'm very sad about him. (speciality doctor, male)*

35

36 268 All participants described the violence that their colleagues had experienced, and those were similar  
37  
38 269 to their own. Some colleagues and co-workers were arrested, had gone missing and never seen later,  
39  
40 270 some found dead with marks with severe abuse. Participants had also lost their colleagues in  
41  
42 271 airstrikes.

42

43

44 272 *I have seen colleagues killed in front of my eyes. In [place retracted] was a doctor, and she was taken.*  
45  
46 273 *They [the unknown perpetrator] took her. Later she was found raped and dead. (speciality doctor,*  
47  
48 274 *male)*

48

49

50 275 Participants saw and experienced their colleagues being humiliated and occasionally arrested in the  
51  
52 276 hospitals, sometimes in the middle of medical operations.

53

54

55 277 *[Name retracted] was like a brother. He got arrested in a real, humiliating way. He was changing*  
56  
57 278 *the bandages to the patient. They [GoS] took him from the room. [They] covered his face in front of*  
58  
59 279 *the staff of the hospital. They didn't let anyone talk to him or ask where [GoS] were taking him.*  
60  
60 280 *(speciality doctor, male)*

1  
2  
3 281 Some participants made their decision to leave once their colleagues had been arrested, gone missing  
4  
5 282 or found dead. The fear of being caught by the GoS was a significant reason to escape. Many were  
6  
7 283 afraid about their captured colleagues giving up their name under torture. However, a  
8  
9 284 relationship marked by solidarity existed among the professionals.

10  
11 285 *One of my colleagues was arrested. Under a lot of pressure, they have their methods that you talk.*  
12  
13 286 *He mentioned my name. I had to pay to get out of Syria and out of Aleppo. I left everything behind.*  
14  
15 287 (general practitioner, male)

16  
17 288 Also, as a HCW, participants were concerned the roadblocks. This was considered stressful when  
18  
19 289 travelling for work. Participants described the incidences on the checkpoints. Sometimes they were  
20  
21 290 stopped for more extended periods and inspections, sometimes detained. They considered that this  
22  
23 291 was due to their profession.

24 292  
25  
26 293 *At the [GoS] checkpoints, many doctors were arrested. One orthopaedic and his wife. This doctor*  
27  
28 294 *had no problems [with GoS], and he had done nothing. He was taken from the roadblock. He was in*  
29  
30 295 *prison for five months. His wife had to pay 800 000 Syrian pounds to get him away. This was in 2013.*  
31 296 (general practitioner, male)

32  
33  
34 297 Hospitals became threatening due to constant military and GoS presence. Armed soldiers were  
35  
36 298 experienced as intimidating and reduced the willingness of HCWs to show up at work. One of the  
37 299 interviewees described having seen sharpshooters on hospital roofs aiming at people and even  
38  
39 300 shooting them.

40  
41  
42 301 *In the hospital where worked, the situation changed. It started to look like a military base. The*  
43  
44 302 *soldiers were going in and out with their weapons. Most of the doctors and other health care workers*  
45 303 *did not come to work because they were afraid of the soldiers with guns. They could cause you*  
46  
47 304 *troubles for no reason.* (speciality doctor, male)

48  
49  
50 305 In many cases, when the governmental forces arrived to investigate the hospital, HCWs warned their  
51  
52 306 colleagues in danger of being arrested. The warning allowed them to avoid being captured. This was  
53 307 very dangerous, and in several cases, the interviewees reported GoS had arrested their colleagues.

54  
55  
56 308 *I heard that my name was asked in the hospital I am working. I felt that I was in danger. I fled out of*  
57  
58 309 *the country. When someone is asking about you in Syria, that is the mukhabarat [security service].*  
59 310 *My friend was arrested in front of the hospital. One week before his arrest, they start to ask about*  
60

1  
2  
3  
4  
5  
6  
7  
8  
9  
10  
11  
12  
13  
14  
15  
16  
17  
18  
19  
20  
21  
22  
23  
24  
25  
26  
27  
28  
29  
30  
31  
32  
33  
34  
35  
36  
37  
38  
39  
40  
41  
42  
43  
44  
45  
46  
47  
48  
49  
50  
51  
52  
53  
54  
55  
56  
57  
58  
59  
60

311 *him. One nurse in the hospital called me and [said] "There is someone from the military department*  
312 *and asked about you". (general practitioner, male)*

313 The opposite was also true. A fraction of the workers sided with the GoS according to participants.  
314 They could spy on their colleagues, record their conversations and then turn them in. Due to strict  
315 internal monitoring anti-government discussions, even in private settings, could be carried to  
316 government officials.

317 *They [security forces] opened the phone, and there were conversations between doctors. Some doctor*  
318 *or nurse have recorded conversations and then give them to the security service. We were arrested*  
319 *for 24- 28 hours. (speciality doctor, male)*

320 While many left Syria under indirect threat, some of the professionals were persuaded to abandon  
321 their country only after having been personally threatened or imprisoned – some for extended periods.

322 *After [released from the prison after six months], another intelligence department [officer] came to*  
323 *my house. They were looking for me. They were asking for my house - again. I left Aleppo to*  
324 *Turkey. (speciality doctor, male)*

325 A few years after the beginning of the conflict, other warring parties started causing problems for  
326 HCWs. ISIS was considered the most significant threat among the GoS.

327 *ISIS arrested me. It was scary. In 2014 in Tel Abyad. For seven hours, then they let me leave. This*  
328 *was the main reason I decided to leave Syria. After being interrogated by ISIS, I decided that even I*  
329 *have studied for 12 years, I am not ready for this getting 1000 to 2000 USD per month [salary].*  
330 *Those seven hours they interrogated me was a changing moment in my life. It was the first time when*  
331 *something like that happened to me. Those seven hours felt like seven years... (speciality doctor,*  
332 *male)*

333 HCWs are more likely to encounter events and victims of mistreatment due to the very nature of their  
334 profession. They witnessed the abuse of civilians while practising their profession. The interviewees  
335 describe having seen people subjected to violence and taken by GoS. Many of those persons  
336 imprisoned had been tortured before they were brought to hospitals.

337 *We have seven patients taken by intelligence. We were receiving patients from the intelligence, after*  
338 *torturing in prison to cure them. Sometimes they bring dead bodies and throw them in front of us.*  
339 *Sometimes they took patients from the hospitals. Somebody who went to protest was shot or stabbed*

1  
2  
3 340 *by Shabbiha [pro-government militia]. He [patient] came with his family or ambulance or by himself*  
4  
5 341 *to the hospital to take treatment. They knew [GoS] that he was there, and they would come. Even*  
6  
7 342 *before treating him. Or while treating him. I know many cases. (speciality doctor, male)*  
8

9 343  
10  
11  
12 344 **DISCUSSION**  
13  
14

15 345 To our knowledge, this is the first research to examine the reasons why Syrian health care workers  
16  
17 346 migrate from the conflict-affected country. This qualitative study presents the perspectives of the 20  
18  
19 347 Syrian HCWs who left the country at some point of the conflict. All participants left Syria because  
20  
21 348 of security reasons. HCWs considered their profession as the reason for getting targeted. They  
22 349 migrated because of this, but also due to other personal issues and for the generalised violence.  
23

24 350 While among the warring parties ISIS and NSAGs were mostly responsible for generalised violence  
25  
26 351 and sometimes acted against the participants for personal reasons, the GoS seemed to target HCWs  
27  
28 352 specifically because of their profession. This is in accordance with multiple reports and  
29  
30 353 studies.[7,14,22,23,25] Many HCWs had to weigh the lack of prospects and accumulating stress  
31 354 against the equally intimidating challenge of actually trying to leave the country. While some  
32  
33 355 participants had a specific notable trigger event, such as a colleague being detained or killed, many  
34  
35 356 just grew tired of trying to manage under the constant threat and fear.  
36

37 357 Financial issues and concerns regarding training were mentioned as reasons for leaving.[19] In this  
38  
39 358 study, however, we found no HCWs indicating either factor as the primary cause for leaving. Doocy  
40  
41 359 et al.[27] state that the choice to go is practically always a sum of many different factors. Our study  
42 360 suggested that all reasons were related to security issues. It appears the ever-present violence and  
43  
44 361 complexity of the war in Syria supersedes all other concerns.  
45

46 362 The average participant attending this study was a 36-year old male with a family and a medical  
47  
48 363 doctor with a speciality. This profile is in accordance with other studies[20,21,27] that have shown  
49  
50 364 male gender and similar age structure to associate with the risk of targeted violence and migration,  
51  
52 365 and on the other hand, the will of protecting the family as an important reason to leave. As one of our  
53 366 participants said, he would be working in Syria if he did not have a family. When experienced HCWs  
54  
55 367 leave the country, the remaining personnel are left without sufficient professional expertise as has  
56  
57 368 happened in Iraq.[1] This reduces the quality of health care services and adds to the workload of those  
58 369 staying.[15,25]  
59  
60



1

2

3 370 The emotional distress of violence on HCWs is enormous. Participants have lost colleagues, friends  
4  
5 371 and family members. In addition to their experienced traumas, they are most likely to have secondary  
6  
7 372 traumas through witnessing atrocities against civilians while working as HCWs near the front-line of  
8  
9 373 war. Despite this, some of our participants were visiting monthly in Syria as a humanitarian worker.  
10 374 The motivations for this should be studied more closely because it might help find solutions on how  
11  
12 375 to get senior HCWs back permanently to Syria now, as the violence starts to show signs of decreasing.  
13  
14 376 The availability of health care personnel is one of the central issues of rebuilding civil society.  
15 377 However, finding qualified HCWs is challenging when the majority of them have left the country.[15]  
16  
17 378 Also, medical students had to leave their undergraduate studies and postgraduation specialisation  
18  
19 379 training as they fled the violence.[17] These amount to a significant loss of human capital for the  
20  
21 380 Syrian health care system. Restoring both current and future provision of services to an acceptable  
22 381 level will be extremely demanding.  
23  
24

## 25 382 **Strengths and limitations**

26

27

28 383 The present research is subjected to several limitations. Firstly, while we reached participants from  
29  
30 384 several different Syrian governorates (Homs, Daraa, Deir Ez-Zour, Raqqa, Hama, Rif Damascus),  
31  
32 385 most of were originally from Aleppo. On the other hand, they had worked in different locations and  
33 386 had experienced violence in areas under all warring parties. More studies should be obtained from all  
34  
35 387 these areas, especially from those that had been controlled by ISIS. Many interviewees considered  
36  
37 388 ISIS as one of the main factors for leaving. Secondly, the snowball sampling method is conducive to  
38 389 selection bias.[30] We used three different parallel SSM networks to reduce this. Thirdly, the  
39  
40 390 perspectives of female HCWs are partly missing. Future research should concentrate not only on  
41  
42 391 gender-based violence but also on the experiences of female HCWs and their reasons for leaving  
43 392 Syria.  
44

45 393

46

47 394 Obtaining data in a conflict-setting, especially first-hand accounts of personal experiences, is  
48  
49 395 challenging. One of the authors is a Syrian HCW who has lived and worked mostly in NSAG and  
50 396 Kurdish forces-controlled areas. His first-hand knowledge made this study carry more weights this  
51  
52 397 study and gives us a better understanding of the situation in such areas of Syria which researchers  
53  
54 398 generally have not been able to visit due to the presence of severe security risks.  
55

56

57 399

58

59

60 400

## 60 400 **CONCLUSION**

1  
2  
3 401 This research adds detailed information on how HCWs have experienced violence in conflict-torn  
4  
5 402 Syria. This study gives a voice to Syrian health care workers who have witnessed horrors of conflict  
6  
7 403 with extensive destruction and subsequently had no alternative but to leave their homes and work to  
8  
9 404 protect themselves and their families. A better understanding of this type of forced migration is  
10 405 needed to develop approaches to support HCWs psychologically and practically in a time of war.  
11  
12

13 406 Our interviewees described such violence and attacks against health care that may constitute  
14  
15 407 violations against Geneva Conventions. Thus, these actions might be considered war crimes and  
16  
17 408 would then require perpetrators to be held accountable.  
18  
19  
20  
21

## 22 410 **ACKNOWLEDGEMENTS**

23  
24  
25 411 The authors would like to sincerely thank all those brave health care workers who trusted us and  
26  
27 412 shared their experiences with us.  
28  
29

30 413 **Contributors** AK, MH, HJ and JK designed and conceptualised the study. AK, MH and OA,  
31  
32 414 coordinated and carried out data collection. AK and JP coded the data. AK, OA, and JP analysed and  
33  
34 415 interpreted the data. AK led manuscript writing with contributions from OA, JP, MH, HJ and JK. All  
35 416 authors reviewed the final manuscript.  
36  
37

38 417 **Funding** The field trip to Turkey was financially supported by the Foundation of the Finnish Institute  
39  
40 418 in the Middle East. The Alfred Kordelin Foundation funded Agneta Kallström's work.  
41

42 419 **Disclaimer** Foundation of the Finnish Institute in the Middle East or The Alfred Kordelin Foundation  
43  
44 420 was not involved in any step of this research. The notions and views are those of the authors.  
45  
46

47 421 **Competing interests** No competing interests.  
48

49 422 **Patient consent** No patients or members of the public were involved in the conduct of this research  
50  
51

52 423 **Ethics approval** An ethical permit for the study was applied for and obtained from the University of  
53  
54 424 Eastern Finland Committee on Research Ethics in 2016.  
55

56 425 **Provenance and peer review** Not commissioned; externally peer-reviewed.  
57

58 426 **Data sharing statement** Data can be obtained from the corresponding author.  
59  
60

1  
2  
3 427  
4  
5  
6 428  
7  
8 429  
9  
10  
11 430  
12  
13  
14 431  
15 432  
16  
17 433  
18  
19 434  
20  
21 435  
22  
23 436  
24  
25 437  
26 438  
27  
28  
29 439  
30 440  
31  
32 441  
33 442  
34 443  
35  
36 444  
37  
38 445  
39  
40 446  
41  
42 447  
43 448  
44 449  
45 450  
46 451  
47 452  
48 453  
49 454  
50 455  
51 456  
52 457  
53 458  
54 459  
55 460

## REFERENCES

- 1 Burnham G, Malik S, Al-Shibli A, *et al.* Understanding the impact of conflict on health services in Iraq: Information from 401 Iraqi refugee doctors in Jordan. *Int J Health Plann Manage* 2012;**27**:e51-64. doi:10.1002/hpm.1091
- 2 Baker A. Syria's Health Crisis Spirals As Doctors Flee. *Time*. 2014. <https://time.com/3968/syrias-health-crisis-spirals-as-doctors-flee/> (accessed 15 Jun 2020).
- 3 Blanchet K, Abbara A, M.Fouad F, *et al.* The effects of conflict on Syria's health system and human resources for health. *World Health Popul* 2016;**16**:87-95.
- 4 The Safeguarding Health in Conflict Coalition. Health workers at risk: Violence against health care. 2020. [file:///C:/Users/35840/Desktop/SHCC2020final \(1\).pdf](file:///C:/Users/35840/Desktop/SHCC2020final%20(1).pdf) (accessed 10 Jun 2020).
- 5 Druce P, Bogatyreva E, Siem FF, *et al.* Approaches to protect and maintain health care services in armed conflict - Meeting SDGs 3 and 16. *Confl Health* 2019;**13**. doi:10.1186/s13031-019-0186-0
- 6 Friedrich MJ. Human Rights Report Details Violence Against Health Care Workers in Bahrain. *JAMA* 2011;**306**:475-6. doi:10.1001/jama.2011.1091
- 7 Fouad FM, Sparrow A, Tarakji A, *et al.* Health workers and the weaponisation of health care in Syria: a preliminary inquiry for The Lancet-American University of Beirut Commission on Syria. *Lancet*. 2017;**390**:2516-26. doi:10.1016/S0140-6736(17)30741-9
- 8 Physicians for Human Rights. A physician's ethical responsibility to provide care during time of war is identical to that during time of peace. 2020. <https://phr.org/issues/health-under-attack/medical-neutrality/> (accessed 26 May 2020).
- 9 Amnesty International. Health crisis: Syrian government targets the wounded and health workers. London: 2011.
- 10 United Nations Human Rights Council. Human rights situations that require the Council's attention Assault on medical care in Syria. 2013.

1

2

- 3 456 11 ICRC. Protocol I (51) Protection of the civilian population. In: *Protocol Additional to the*  
4 *Geneva Conventions of 12 August 1949, and relating to the Protection of Victims of*  
5 457 *International Armed Conflicts (Protocol I), Entry into force 7 December 1979.* 1977.  
6 458  
7  
8  
9 459 12 Médecins Sans Frontières. MSF-Analysis. Treating Terrorists. 2015.[https://msf-](https://msf-analysis.org/new-treating-terrorists/)  
10 460 [analysis.org/new-treating-terrorists/](https://msf-analysis.org/new-treating-terrorists/) (accessed 23 May 2020).  
11  
12  
13 461 13 Physicians for Human Rights. Medical Personnel Are Targeted in Syria.  
14 462 2020.<https://phr.org/our-work/resources/medical-personnel-are-targeted-in-syria/> (accessed 9  
15 463 Feb 2020).  
16  
17  
18 464 14 Koteiche R, Murad S, Heisler M. My Only Crime Was That I Was a Doctor. Physicians Hum.  
19 465 Rights. 2019.[https://phr.org/our-work/resources/my-only-crime-was-that-i-was-a-](https://phr.org/our-work/resources/my-only-crime-was-that-i-was-a-doctor/#phr_toc_0)  
20 466 [doctor/#phr\\_toc\\_0](https://phr.org/our-work/resources/my-only-crime-was-that-i-was-a-doctor/#phr_toc_0) (accessed 24 Apr 2020).  
21  
22  
23  
24 467 15 Fardousi N, Douedari Y, Howard N. Healthcare under siege: a qualitative study of health-  
25 468 worker responses to targeting and besiegement in Syria. *BMJ Open* 2019;**9**:e029651.  
26 469 doi:10.1136/bmjopen-2019-029651  
27  
28  
29 470 16 United Nations Office for the Coordination of Humanitarian Affairs. Syria anniversary press  
30 471 release. 2020.  
31  
32  
33 472 17 Abbara A, Orcutt M, Gabbar O. Syria's lost generation of doctors. *BMJ Br Med J* 2015;**350**.  
34  
35  
36 473 18 Natasha H, Hosain M, Ho L. Effects of conflict on health. In: *Conflict and Health*. Berkshire:  
37 474 : Open University Press. McGraw Hill Education 2012. 25–31.  
38  
39  
40 475 19 Bou-Karroum L, Daou KN, Nomier M, *et al.* Health Care Workers in the setting of the 'Arab  
41 476 Spring': A scoping review for the Lancet-AUB Commission on Syria. *J Glob Health*  
42 477 2019;**9**:010402. doi:10.7189/jogh.09.010402  
43  
44  
45 478 20 Kronfol NM, Sibai AM, Rafeh N. The impact of civil disturbances on the migration of  
46 479 physicians: The case of Lebanon. *Med Care* 1992;**5**:29–35. doi:10.1097/00005650-  
47 480 199203000-00003  
48  
49  
50 481 21 Burnham G, Doocy S, Lafta R. Doctors leaving 12 tertiary hospitals in Iraq, 2004–2007. *Soc*  
51 482 *Sci Med* 2009;**69**:172–7. doi:10.1016/j.socscimed.2009.05.021  
52  
53  
54 483 22 Elamein M, Bower H, Valderrama C, *et al.* Attacks against health care in Syria, 2015–16:  
55 484 results from a real-time reporting tool. *Lancet* Published Online First: 2017.  
56 485 doi:10.1016/S0140-6736(17)31328-4  
57  
58  
59  
60 486 23 Ri S, Blair AH, Kim CJ, *et al.* Attacks on healthcare facilities as an indicator of violence against

1  
2  
3  
4  
5  
6  
7  
8  
9  
10  
11  
12  
13  
14  
15  
16  
17  
18  
19  
20  
21  
22  
23  
24  
25  
26  
27  
28  
29  
30  
31  
32  
33  
34  
35  
36  
37  
38  
39  
40  
41  
42  
43  
44  
45  
46  
47  
48  
49  
50  
51  
52  
53  
54  
55  
56  
57  
58  
59  
60

- 487 civilians in Syria: An exploratory analysis of open-source data. *PLoS One* Published Online  
488 First: 2019. doi:10.1371/journal.pone.0217905
- 489 24 Wong CH, Chen CYT. Ambulances under siege in Syria. *BMJ Glob Heal* 2018;**3**.  
490 doi:10.1136/bmjgh-2018-001003
- 491 25 Footer KHA, Clouse E, Reyes D, *et al.* Qualitative accounts from Syrian health professionals  
492 regarding violations of the right to health, including the use of chemical weapons, in  
493 opposition-held Syria. *BMJ Open* 2018;**8**.
- 494 26 Stilwell B, Diallo K, Zurn P, *et al.* Migration of health-care workers from developing countries:  
495 Strategic approaches to its management. *Bull World Health Organ* Published Online First:  
496 2004. doi:/S0042-96862004000800009
- 497 27 Doocy S, Malik S, Burnham G. Experiences of Iraqi doctors in Jordan during conflict and  
498 factors associated with migration. *Am J Disaster Med* 2010;**5**:41–7.  
499 doi:10.5055/ajdm.2010.0005
- 500 28 Al-Khalisi N. The Iraqi medical brain drain: A cross-sectional study. *Int J Heal Serv*  
501 2013;**43**:363–78. doi:10.2190/HS.43.2.j
- 502 29 International Labour Office. International Standard Classification of Occupations Structure,  
503 group definitions and correspondence tables. ISCO-08. Volume I. 2012.
- 504 30 Kaplan CD, Korf D, Sterk C. Temporal and social contexts of heroin-using population: An  
505 illustration of the snowball sampling. *J Ment Nerv Disord* 1987;**9**:566–74.  
506 doi:10.1097/00005053-198709000-00009
- 507 31 World Health Organization. World report on violence and health: summary. Geneva: 2002.
- 508 32 World Health Organization. Attacks on health care. 2019.[https://www.who.int/news-room/q-](https://www.who.int/news-room/q-a-detail/attacks-on-health-care)  
509 [a-detail/attacks-on-health-care](https://www.who.int/news-room/q-a-detail/attacks-on-health-care) (accessed 25 May 2020).

## COREQ (CONsolidated criteria for REporting Qualitative research) Checklist

A checklist of items that should be included in reports of qualitative research. You must report the page number in your manuscript where you consider each of the items listed in this checklist. If you have not included this information, either revise your manuscript accordingly before submitting or note N/A.

| Topic                                          | Item No. | Guide Questions/Description                                                                                                                              | Reported on Page No. |
|------------------------------------------------|----------|----------------------------------------------------------------------------------------------------------------------------------------------------------|----------------------|
| <b>Domain 1: Research team and reflexivity</b> |          |                                                                                                                                                          |                      |
| <i>Personal characteristics</i>                |          |                                                                                                                                                          |                      |
| Interviewer/facilitator                        | 1        | Which author/s conducted the interview or focus group?                                                                                                   |                      |
| Credentials                                    | 2        | What were the researcher's credentials? E.g. PhD, MD                                                                                                     |                      |
| Occupation                                     | 3        | What was their occupation at the time of the study?                                                                                                      |                      |
| Gender                                         | 4        | Was the researcher male or female?                                                                                                                       |                      |
| Experience and training                        | 5        | What experience or training did the researcher have?                                                                                                     |                      |
| <i>Relationship with participants</i>          |          |                                                                                                                                                          |                      |
| Relationship established                       | 6        | Was a relationship established prior to study commencement?                                                                                              |                      |
| Participant knowledge of the interviewer       | 7        | What did the participants know about the researcher? e.g. personal goals, reasons for doing the research                                                 |                      |
| Interviewer characteristics                    | 8        | What characteristics were reported about the interviewer/facilitator? e.g. Bias, assumptions, reasons and interests in the research topic                |                      |
| <b>Domain 2: Study design</b>                  |          |                                                                                                                                                          |                      |
| <i>Theoretical framework</i>                   |          |                                                                                                                                                          |                      |
| Methodological orientation and Theory          | 9        | What methodological orientation was stated to underpin the study? e.g. grounded theory, discourse analysis, ethnography, phenomenology, content analysis |                      |
| <i>Participant selection</i>                   |          |                                                                                                                                                          |                      |
| Sampling                                       | 10       | How were participants selected? e.g. purposive, convenience, consecutive, snowball                                                                       |                      |
| Method of approach                             | 11       | How were participants approached? e.g. face-to-face, telephone, mail, email                                                                              |                      |
| Sample size                                    | 12       | How many participants were in the study?                                                                                                                 |                      |
| Non-participation                              | 13       | How many people refused to participate or dropped out? Reasons?                                                                                          |                      |
| <i>Setting</i>                                 |          |                                                                                                                                                          |                      |
| Setting of data collection                     | 14       | Where was the data collected? e.g. home, clinic, workplace                                                                                               |                      |
| Presence of non-participants                   | 15       | Was anyone else present besides the participants and researchers?                                                                                        |                      |
| Description of sample                          | 16       | What are the important characteristics of the sample? e.g. demographic data, date                                                                        |                      |
| <i>Data collection</i>                         |          |                                                                                                                                                          |                      |
| Interview guide                                | 17       | Were questions, prompts, guides provided by the authors? Was it pilot tested?                                                                            |                      |
| Repeat interviews                              | 18       | Were repeat interviews carried out? If yes, how many?                                                                                                    |                      |
| Audio/visual recording                         | 19       | Did the research use audio or visual recording to collect the data?                                                                                      |                      |
| Field notes                                    | 20       | Were field notes made during and/or after the interview or focus group?                                                                                  |                      |
| Duration                                       | 21       | What was the duration of the interviews or focus group?                                                                                                  |                      |
| Data saturation                                | 22       | Was data saturation discussed?                                                                                                                           |                      |
| Transcripts returned                           | 23       | Were transcripts returned to participants for comment and/or                                                                                             |                      |

| Topic                                  | Item No. | Guide Questions/Description                                                                                                        | Reported on Page No. |
|----------------------------------------|----------|------------------------------------------------------------------------------------------------------------------------------------|----------------------|
|                                        |          | correction?                                                                                                                        |                      |
| <b>Domain 3: analysis and findings</b> |          |                                                                                                                                    |                      |
| <i>Data analysis</i>                   |          |                                                                                                                                    |                      |
| Number of data coders                  | 24       | How many data coders coded the data?                                                                                               |                      |
| Description of the coding tree         | 25       | Did authors provide a description of the coding tree?                                                                              |                      |
| Derivation of themes                   | 26       | Were themes identified in advance or derived from the data?                                                                        |                      |
| Software                               | 27       | What software, if applicable, was used to manage the data?                                                                         |                      |
| Participant checking                   | 28       | Did participants provide feedback on the findings?                                                                                 |                      |
| <i>Reporting</i>                       |          |                                                                                                                                    |                      |
| Quotations presented                   | 29       | Were participant quotations presented to illustrate the themes/findings?<br>Was each quotation identified? e.g. participant number |                      |
| Data and findings consistent           | 30       | Was there consistency between the data presented and the findings?                                                                 |                      |
| Clarity of major themes                | 31       | Were major themes clearly presented in the findings?                                                                               |                      |
| Clarity of minor themes                | 32       | Is there a description of diverse cases or discussion of minor themes?                                                             |                      |

Developed from: Tong A, Sainsbury P, Craig J. Consolidated criteria for reporting qualitative research (COREQ): a 32-item checklist for interviews and focus groups. *International Journal for Quality in Health Care*. 2007. Volume 19, Number 6: pp. 349 – 357

**Once you have completed this checklist, please save a copy and upload it as part of your submission. DO NOT include this checklist as part of the main manuscript document. It must be uploaded as a separate file.**

# BMJ Open

**I had to leave. I had to leave my clinic, my city, leave everything behind in Syria**  
**Qualitative research of Syrian healthcare workers migrating from the war-torn country**

|                                 |                                                                                                                                                                                                                                                                                                                                                                                                                                                                                                                                                                    |
|---------------------------------|--------------------------------------------------------------------------------------------------------------------------------------------------------------------------------------------------------------------------------------------------------------------------------------------------------------------------------------------------------------------------------------------------------------------------------------------------------------------------------------------------------------------------------------------------------------------|
| Journal:                        | <i>BMJ Open</i>                                                                                                                                                                                                                                                                                                                                                                                                                                                                                                                                                    |
| Manuscript ID                   | bmjopen-2021-049941.R1                                                                                                                                                                                                                                                                                                                                                                                                                                                                                                                                             |
| Article Type:                   | Original research                                                                                                                                                                                                                                                                                                                                                                                                                                                                                                                                                  |
| Date Submitted by the Author:   | 30-Jun-2021                                                                                                                                                                                                                                                                                                                                                                                                                                                                                                                                                        |
| Complete List of Authors:       | Kallström, Agneta; University of Eastern Finland Faculty of Health Sciences, Institute of Public Health and Clinical Nutrition<br>al-Abdulla, Orwa; University of Eastern Finland Faculty of Health Sciences, Institute of Public Health and Clinical Nutrition<br>Parkki, Jan; independent researcher<br>Häkkinen, Mikko; Laurea University of Applied Sciences<br>Juusola, Hannu; University of Helsinki, Department of Cultures<br>Kauhanen, Jussi; University of Eastern Finland Faculty of Health Sciences, Institute of Public Health and Clinical Nutrition |
| <b>Primary Subject Heading</b>: | Global health                                                                                                                                                                                                                                                                                                                                                                                                                                                                                                                                                      |
| Secondary Subject Heading:      | Health policy                                                                                                                                                                                                                                                                                                                                                                                                                                                                                                                                                      |
| Keywords:                       | ETHICS (see Medical Ethics), HEALTH SERVICES ADMINISTRATION & MANAGEMENT, Health & safety < HEALTH SERVICES ADMINISTRATION & MANAGEMENT, Human resource management < HEALTH SERVICES ADMINISTRATION & MANAGEMENT, MEDICAL ETHICS                                                                                                                                                                                                                                                                                                                                   |
|                                 |                                                                                                                                                                                                                                                                                                                                                                                                                                                                                                                                                                    |

SCHOLARONE™  
Manuscripts



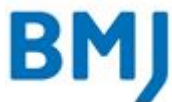

I, the Submitting Author has the right to grant and does grant on behalf of all authors of the Work (as defined in the below author licence), an exclusive licence and/or a non-exclusive licence for contributions from authors who are: i) UK Crown employees; ii) where BMJ has agreed a CC-BY licence shall apply, and/or iii) in accordance with the terms applicable for US Federal Government officers or employees acting as part of their official duties; on a worldwide, perpetual, irrevocable, royalty-free basis to BMJ Publishing Group Ltd ("BMJ") its licensees and where the relevant Journal is co-owned by BMJ to the co-owners of the Journal, to publish the Work in this journal and any other BMJ products and to exploit all rights, as set out in our [licence](#).

The Submitting Author accepts and understands that any supply made under these terms is made by BMJ to the Submitting Author unless you are acting as an employee on behalf of your employer or a postgraduate student of an affiliated institution which is paying any applicable article publishing charge ("APC") for Open Access articles. Where the Submitting Author wishes to make the Work available on an Open Access basis (and intends to pay the relevant APC), the terms of reuse of such Open Access shall be governed by a Creative Commons licence – details of these licences and which [Creative Commons](#) licence will apply to this Work are set out in our licence referred to above.

Other than as permitted in any relevant BMJ Author's Self Archiving Policies, I confirm this Work has not been accepted for publication elsewhere, is not being considered for publication elsewhere and does not duplicate material already published. I confirm all authors consent to publication of this Work and authorise the granting of this licence.

1  
2  
3 1 *I had to leave. I had to leave my clinic, my city, leave everything behind in Syria*

4  
5 2 Qualitative research of Syrian healthcare workers migrating from the war-torn country

6  
7 3

8  
9 4

10  
11 5 Corresponding author: Kallström, Agneta, (MA) The University of Eastern Finland. Faculty of Health  
12 Sciences. P.O. box 1627. FI-70211 Kuopio, Finland. agneta.kallstrom@helsinki.fi

13  
14 7

15  
16 8 Al Abdulla, Orwa, (DMD, MPH) The University of Eastern Finland. Faculty of Health Sciences

17  
18 9 Parkki, Jan, (MD, M.Sc.) Independent advisor, Helsinki, Finland

19  
20 10 Häkkinen, Mikko, (PhD.), The Laurea University of Applied Sciences

21  
22 11 Juusola, Hannu, (PhD.) The University of Helsinki, Faculty of Arts, Middle Eastern Studies

23  
24 12 Kauhanen Jussi, (MD, MPH, PhD), The University of Eastern Finland. Faculty of Health Sciences.

25  
26 13 Word count

27  
28 14

29  
30 15

31  
32 16

33  
34 17

35  
36 18

37  
38 19

39  
40 20

41  
42 21

43  
44 22

45  
46 23

47  
48 24

49  
50 25

51  
52 26

53  
54 27

55  
56 28

57  
58 29

59  
60 30

1  
2  
3 31  
4  
5 32  
6  
7 33  
8  
9 34  
10  
11 35  
12  
13 36  
14  
15 37  
16  
17 38  
18  
19 39  
20  
21 40  
22  
23  
24 41  
25  
26  
27 42  
28  
29 43  
30  
31  
32 44  
33  
34 45  
35  
36 46  
37  
38 47  
39  
40 48  
41  
42  
43 49  
44  
45 50  
46  
47 51  
48  
49 52  
50  
51 53  
52  
53 54  
54  
55 55  
56 56  
57  
58  
59  
60

Qualitative research of Syrian healthcare workers migrating from the war-torn country

## ABSTRACT

**Objectives:** To explore the reasons why healthcare workers migrate from Syria, a country where conflict has been raging for over a decade.

**Design:** A qualitative study was performed using semi-structured interviews. Semi-structured questions guided in-depth interviews. Content analysis was used.

**Setting:** Participants were Syrian healthcare workers who had worked in the country after the conflict started in 2011, but at some point, left Syria and settled abroad. The interviews took place in Turkey and in Europe in 2016 and 2017.

**Participants:** We collected data from 20 participants (18 males and 2 females) through snowball sampling method.

**Results:** Healthcare workers migrated from Syria only because of security reasons. In most cases, the decision to leave resulted from the generalised violence against civilians by different warring parties, mainly the Government of Syria and the Islamic State. Intentional attacks against healthcare workers were also one of the main reasons for leaving. Some participants had a specific notable trigger event before leaving, such as colleagues being detained or killed. Many participants simply grew tired of living under constant fear, with their families also at risk.

1  
2  
3 57 **Conclusions:** This research adds to the body of literature on violence against healthcare workers in  
4  
5 58 Syria. It helps to understand the reasons why healthcare workers leave the country. The study also  
6  
7 59 indicates that the international community has failed to protect Syrian healthcare workers. The  
8  
9 60 intensity of the conflict has left many healthcare workers with no other option than to leave.  
10 61 Understanding this migration will enable the discovery of new solutions for protecting healthcare  
11  
12 62 workers in current and future conflicts.  
13

14 63 **Keywords:** Syria, healthcare worker, conflict, violence, migration, ISIS, qualitative, snowball  
15  
16 64 method  
17  
18  
19  
20  
21  
22  
23  
24  
25  
26  
27  
28  
29  
30  
31  
32  
33  
34  
35  
36  
37  
38  
39  
40  
41  
42  
43  
44  
45  
46  
47  
48  
49  
50  
51  
52  
53  
54  
55  
56  
57  
58  
59  
60

1  
2  
3 66 **STRENGTHS AND LIMITATIONS OF THIS STUDY**  
4  
5

- 6 67 • This qualitative, semi-structured interview study, employing snowball sampling method,  
7 explored the reasons behind high numbers of Syrian healthcare workers' migration.  
8 68  
9  
10 69 • Previous empirical research, especially qualitative explorations of the migration of Syrian  
11 healthcare workers is almost non-existent.  
12 70  
13 71 • A multi-disciplinary research team conducted the interviews, including experienced local  
14 front-line healthcare workers, allowing unique access to sensitive information.  
15 72  
16 73 • Although the interviews were conducted with a relatively small sample of participants, the  
17 saturation point for the data was reached.  
18 74  
19  
20 75 • Most of the participants were male physicians with a speciality, were born in Aleppo  
21 governorate, and resided in Turkey during the study.  
22 76  
23  
24 77

Peer review only

## 78 INTRODUCTION

79 Armed conflicts challenge normal healthcare provision. Healthcare workers (HCWs), one of the most  
80 crucial factors of healthcare services, often migrate away from conflict-affected areas.[1–3] In 2020,  
81 at least 162 HCWs in 20 countries were killed and 152 injured.[4] Notably, attacks against HCWs  
82 took place during the events known as the Arab Spring, a revolutionary wave of demonstrations and  
83 protests starting in 2010 from Tunisia. Anti-government demonstrations escalated into violence in  
84 several states around the Middle East. In Syria, the events turned into an armed conflict that is still  
85 ongoing. Especially in Syria, Bahrain, Yemen, and Iraq, HCWs have been targeted since the Arab  
86 Spring.[5–7]

87 During the decade of war, hospital bombings have become a trademark in the Syrian conflict.  
88 Violence against HCWs and thus the denial of healthcare services to the population has been used as  
89 a war strategy [7] even though the International Humanitarian Law (IHL) stipulates that the healthcare  
90 system is protected in a time of war. The government must protect HCWs' medical neutrality, which  
91 means freedom for the HCWs to take care of patients regardless of their political affiliations [8]. From  
92 the beginning of the conflict, the Government of Syria (GoS) is reported to have punished HCWs for  
93 treating injured protestors [9,10] regardless of the IHL statute that *under no circumstances shall any*  
94 *person be punished for carrying out medical activities compatible with medical ethics, regardless of*  
95 *the person benefiting from them.*[11] In 2012, the GoS effectively criminalised healthcare provision  
96 to people belonging to the opposition.[10,12]

97 At least 930 HCWs have been killed in Syria from 2011 through March 2021. All warring parties  
98 have attacked HCWs; however, the GoS with Russia, has been held responsible for these 91%. Non-  
99 state armed groups (NSAGs), Islamic State in Iraq and Syria (ISIS), and Kurdish or unidentified  
100 forces are responsible for 9%. The primary cause of death (55%) is aerial or ground bombardment.  
101 HCWs have also died when detained and tortured or just executed.[13–16] More than 70% of  
102 qualified HCWs have left the country. In some areas, specific specialities are absent.[17,18] Further,  
103 medical students have had to leave their basic and specialisation studies.[19] The absence of  
104 professionals will add to the challenges of both current and future treatment of the population.

105 HCWs, especially physicians, tend to migrate at the early stage of the conflict because they have the  
106 resources to leave.[20] The financial issues, desire for further education, and a better lifestyle are  
107 some key reasons for migration.[21] Further, generalised insecurity, targeted violence, and the desire  
108 to protect ones family are also known reasons.[22,23] In Iraq, a country that has experienced perpetual

1

2

3 109 violence for decades, male physicians over 30 years of age face a significantly increased risk of being  
4 kidnapped or assassinated.[1,24]

5 110  
6  
7 111

8 112 In the study by Doocy et al. [25], leaving Iraq were associated with a violent event for nearly 61%  
9 HCWs. Of the physicians who left the country, 75% had experienced violence against their household  
10 113 members before reaching the decision to leave. In another study by Al-Khalisi [26], 60% of  
11  
12 114 participants had left Iraq for security reasons. However, factors demoralising the HCWs are complex,  
13  
14 115 and the decision to leave is made based on a multiple reasons. [1,27]

15 116  
16  
17 117

18  
19 118 Although research on violence against HCWs has increased in recent years, the number of studies is  
20  
21 119 still limited. Violence in Iraq has been studied somewhat more extensively than that of other conflict-  
22 120 afflicted countries. However, the violence against HCWs in Iraq differs from that in Syria, with  
23  
24 121 almost no airstrikes against healthcare facilities. In Syria, Fouad et al. [7] have argued that the  
25  
26 122 bombing of hospitals is part of the weaponisation of healthcare, a strategy of war, by the Government  
27 123 of Syria (GoS).

28  
29

30 124 Most analyses of violence against the healthcare system in Syria have focused on damage to  
31  
32 125 healthcare infrastructures, such as hospitals and ambulances.[28–30] Few studies have explored  
33  
34 126 HCWs' personal experiences through the conflicts[17,31], and none of them examine the reasons for  
35  
36 127 professionals leaving Syria. Furthermore, existing reviews do not consider how violence by different  
37 128 warring parties, such as arrests, detention, and kidnappings, affects the decision to leave. There is  
38  
39 129 significant missing data on secondary trauma, such as witnessing killings of civilians and colleagues  
40  
41 130 and how the constant fear of the conflict itself affects the outward mobility of healthcare  
42 131 professionals.

43  
44

45 132 Initially we aimed to study HCWs' experiences of violence in the ongoing conflict. From that data, a  
46  
47 133 repeating pattern behind migration emerged organically. Consequently, this study focuses on the  
48  
49 134 reasons why HCWs leave Syria. Such loss of resources in a crisis setting is detrimental to the  
50  
51 135 functioning of healthcare and public health. Understanding this behaviour is highly beneficial in order  
52 136 to limit its effects.

53  
54

## 55 137 **METHODS**

56  
57

### 58 138 **Study design and sampling**

59  
60

1  
2  
3 139 The participants were identified using a snowball sampling method (SSM). They had to represent  
4  
5 140 the category of HCWs according to the International Labour Organization's International Standards  
6  
7 141 Classification of The Occupations (ISCO-08).[32] SSM was chosen to increase trust in the research,  
8  
9 142 given the sensitivity of the topic. [33] The first participant in the chain was a Syrian healthcare  
10 143 professional living in Gaziantep, Turkey. He had contacted the University of Eastern Finland earlier  
11  
12 144 and was asked to participate (as he was well suited for this study). One female (AK) and two male  
13  
14 145 (MH, OA) researchers conducted the interviews in English or Arabic. The participants selected a  
15 146 suitable place for the interviews, and only the researchers and the participants were present at the  
16  
17 147 time. Participants were informed of the researchers' previous researches and backgrounds. They  
18  
19 148 were also given a written handout with relevant study description and contact information. They  
20  
21 149 were given information about the aim and goals of the study. In practice, the interviews started with  
22 150 background questions and then moved onto the semi-structured main part. After the interview was  
23  
24 151 concluded, the participants were asked to name a few other potential candidates interested in  
25  
26 152 participating in the research. Volunteers among them contacted our research team.

27  
28  
29 153 The duration of the interviews varied from 45 minutes to 90 minutes. We terminated interviews when  
30 154 further inquiry provided no significant new themes.

### 33 155 **Measurement and analysis**

34  
35  
36 156 A semi-structured in-depth interview guided the discussion with the participants. The study was  
37  
38 157 focused on HCWs' reasons for migration from the country after 2011. This approach was based on  
39  
40 158 a constant dialogue between the researcher and the interviewee. While there was a common base list  
41 159 of structured questions to guide the general direction of the interview, open-ended elaboration was  
42  
43 160 encouraged. Additional personalised questions were asked *ad hoc* to explore any further relevant  
44  
45 161 themes each interviewee knew and was willing to talk about. Such flexible technique enabled the  
46 162 interviewer to explore the values and feelings of the participants more thoroughly than any strictly  
47  
48 163 structured interview format would allow. [34]

49 164  
50  
51 165 We defined violence as "*the intentional use of physical force or power, threatened or actual, against*  
52 166 *oneself, another person, or against a group or community, that either results in or has a high*  
53 167 *likelihood of resulting in injury, death, psychological harm, maldevelopment or deprivation*".[35].  
54  
55 167 The attacks against HCWs were understood here as *any act of verbal or physical violence or*  
56 168 *obstruction or threat of violence that interferes with the availability, access, and delivery of curative*  
57 169 *and/or preventive health services during emergencies*.[36]



1

2

3 171

4

5 172 After the interviews were transcribed verbatim and triangulated with hand-written notes, the  
6 173 transcripts were examined. In order to identify the relevant themes, we used inductive content data  
7 174 analysis. The most significant repeating theme in the overall data turned out to be an emphasis on  
8 175 migration i.e. the reasons why the HCWs left the country. Answers were coded into categories using  
9 176 the Excel program. The classifications were based on experiences that indicated motivational factors  
10 177 for leaving the country. These factors were sought both from the direct answers to structured  
11 178 questions and from the free-form replies. These were then classified into thematically unified sub-  
12 179 groups. No previously set system for such division was used, but the classification emerged  
13 180 organically from the population of factors introduced by the interviewees.

14 177

15 178

16 179

17 180

18 181

19 182

20 183

21 184

22 185

23 186

24 187

25 188

26 189

27 190

28 191

29 192

30 193

31 194

32 195

33 196

34 197

35 198

36 199

37 200

38 201

39 202

40 203

41 204

42 205

43 206

44 207

45 208

46 209

47 210

48 211

49 212

50 213

51 214

52 215

53 216

54 217

55 218

56 219

57 220

58 221

59 222

60 223

Quotations have been used to illustrate the themes and findings and provide an authentic voice to the participants.

### **Ethical approval**

The interviews were recorded with the permission of the participants, and consent was obtained verbally. Anonymity and confidentiality were ensured. Participants had an opportunity to ask questions concerning the study. Participants were informed that that they could interrupt or abandon the interview if wanted.

An ethical permit for the study was applied for and obtained from the University of Eastern Finland Committee on Research Ethics. The principles in the Declaration of Helsinki were observed in all stages of the study.

### **Patient and public involvement**

No patients or members of the general public were involved in the conduct of this research.

## **RESULTS**

### **Study population**

The qualitative study is based on semi-structured interviews ( $n=20$ ) of Syrian HCWs who have left the country since 2011. Interviews ( $n=17$ ) were conducted in Gaziantep, a Turkish municipality

|                   |                 |
|-------------------|-----------------|
| <b>Interviews</b> | 20              |
| <b>Gender</b>     |                 |
| male              | 18              |
| female            | 2               |
| <b>Age range</b>  | from 26 to 47 y |
| <b>Mean age</b>   | 36 y            |

199 adjacent to the Syrian border where participants resided at the time of interviews in June 2016 – July  
 200 2016 and early 2017. Additional interviews ( $n=3$ ) were conducted in Europe from late 2016 to early  
 201 2017. Altogether, participants consisted of 18 males and 2 females.

202 The age of participants ranged from 26 to 47 years. The mean age was 36 years. Most of the  
 203 participants were born in the Aleppo governorate ( $n=12$ ). The other participants represented a variety  
 204 of other Syrian provinces. Most of the participants were married ( $n=16$ ) and had at least one child  
 205 ( $n=14$ ). (Table 1)

206 The majority of people interviewed ( $n=14$ ) were physicians with post-graduate speciality; surgery  
 207 and paediatrics were most common ( $n=9$ ). Other healthcare professionals, such as nurse (1),  
 208 pharmacists (3), health service manager (1), and dentist (1), were also interviewed. All those  
 209 interviewed had worked in Syria during the conflict at some point. The working experience varied  
 210 from almost none to over 20 years.

211 One of the participants was a medical student and few general practitioners were residents in  
 212 speciality training. They all had to suspend their studies because of the ongoing violence and leave  
 213 Syria.

214 Table 1: Interviewees' demographic information

1  
2  
3  
4  
5  
6  
7  
8  
9  
10  
11  
12  
13  
14  
15  
16  
17  
18  
19  
20  
21  
22  
23  
24  
25  
26  
27  
28  
29  
30  
31  
32  
33  
34  
35  
36  
37  
38  
39  
40  
41  
42  
43  
44  
45  
46  
47  
48

|     |                                     |    |
|-----|-------------------------------------|----|
|     | <b>Place of birth (governorate)</b> |    |
| 215 | Aleppo                              | 12 |
| 216 | Deir Ez-Zour                        | 2  |
| 217 | Raqqa                               | 2  |
| 218 | Hama                                | 1  |
|     | Homs                                | 1  |
|     | Idlib                               | 1  |
|     | Abroad                              | 1  |
|     | <b>Family status</b>                |    |
|     | married                             | 16 |
|     | children                            | 14 |
|     | <b>Professions</b>                  |    |
|     | physicians, total                   | 14 |
|     | physician with speciality           | 9  |
|     | general practitioner                | 5  |
|     | pharmacist                          | 3  |
|     | nurse                               | 1  |
|     | dentist                             | 1  |
|     | healthcare manager                  | 1  |

219 reasons for leaving Syria were related to violence that started after the demonstrations against the  
220 regime in 2011. The HCWs suffered either from general strain under the violent environment, or were  
221 targeted by several specific violations or both. All participants expressed that their profession was the  
222 reason for targeting. The relative impact of these different forms of insults is further discussed in the  
223 study's conclusions.

224 The participants gradually migrated during the conflict. Some left early when the violence started in  
225 2011–2012, while others left later as the war escalated. Some of them moved to opposition-controlled

1

2

3 226 Eastern Aleppo, some other moved directly to Turkey. Many of those who initially remained in  
4  
5 227 Eastern Aleppo followed. Some migrated to Lebanon due to geographical reasons. Once outside  
6  
7 228 Syria, some HCWs continued to Europe to seek asylum.

8

9

### 10 229 **Generalised violence**

11

12 230 When demonstrations escalated and violence spread after 2011, the participants considered this as  
13  
14 231 one of the turning points in their life. They described their experiences and feelings about what they  
15  
16 232 had witnessed. They had seen atrocities against civilians, including their family and friends. People  
17  
18 233 had been arbitrarily arrested and others randomly disappeared.

19

20 234 *My friends were arrested in front of me. They were beaten, tortured in the streets. I saw these*  
21  
22 235 *incidents. Everyone in Syria saw this. [The GoS was] killing people and shooting. Using tear gas,*  
23  
24 236 *live bullets. (general practitioner, male)*

25

26 237 Before the territorial division between different warring factions, especially the parting of NSAGs-  
27  
28 238 controlled Eastern and GoS controlled Western side of Aleppo, the participants had regularly  
29  
30 239 commuted through GoS checkpoints. They described that the atmosphere had become oppressive.  
31  
32 240 Constant check-ups, arbitrary decisions, such as detainment by the GoS, and increased violence  
33  
34 241 caused widespread psychological stress among the participants.

35

36 242 *This fear of daily violence caused stress and anxious feelings. I could not sleep. I was very afraid. I*  
37  
38 243 *decided to stop working. The reason for this was that I was stopped and bullied at the military*  
39  
40 244 *checkpoint. I was asked ID card. All kinds of questions: "what you are doing in this city that is not*  
41  
42 245 *your hometown, and where does your family live". They just wanted to bully me. Fear of being*  
43  
44 246 *detained was the reason I left Syria. (pharmacists, female)*

45

46 247 A participant said that the situation became impossible for GoS to control, and this resulting power  
47  
48 248 vacuum gave NSAGs room to operate. Some participants expressed their mistrust of these  
49  
50 249 organisations and could not expect any help from the dwindling GoS force.

51

52 250 As the conflict evolved, participants witnessed barrel bombs, chemical attacks, and airstrikes against  
53  
54 251 civilians.

55

56 252 *I saw more than fifteen burnt Kurds, not far from the health care [centre]. Russian airstrike. Their*  
57  
58 253 *relatives came. They didn't [recognised them] because the bodies were burned. Disgusting.'*  
59  
60 254 (speciality doctor, male)

1  
2  
3  
4  
5  
6  
7  
8  
9  
10  
11  
12  
13  
14  
15  
16  
17  
18  
19  
20  
21  
22  
23  
24  
25  
26  
27  
28  
29  
30  
31  
32  
33  
34  
35  
36  
37  
38  
39  
40  
41  
42  
43  
44  
45  
46  
47  
48  
49  
50  
51  
52  
53  
54  
55  
56  
57  
58  
59  
60

255 Other warring parties, mainly ISIS and NSAGs, conducted acts of violence against civilians,  
256 according to participants. While GoS was considered the main perpetrator, ISIS and other NSAGs,  
257 such as Free Syrian Army (FSA) and Jabhat al-Nusra, threatened, mistreated, abducted, and killed  
258 people as participants described.

259 *FSA took one nurse, tortured him for five hours. Then he died. Just because his name was the same*  
260 *as some else's. (speciality doctor, male)*

261 ISIS inspired both fear and animosity against its ideology and values in the participants. The  
262 participants shared unnerving anecdotes of the organisation that were circulating and creating an  
263 oppressive atmosphere of insecurity. Participants described their friends having severe problems with  
264 the organisation. Some of the participants decided to go to Turkey when they noticed ISIS advancing  
265 toward the city of Kobane, Aleppo governorate in northern east Syria. They believed fleeing from the  
266 organisation was their only option.

267 *One of my friends was kidnapped. The siege became more intensive. I knew that something is going*  
268 *to happen. When Kobane was besieged [by ISIS], I left for Turkey. I had to. (nurse, male)*

269 Some participants did not indicate a single reason for leaving but instead said they succumbed to the  
270 constant stress, fear, and harassment because of the escalating situation.

### 271 **Violence related to personal issues**

272 While participants were concerned about the generalised violence, their own and their families' safety  
273 played an important role in the decision to leave Syria. When violence spread, many participants  
274 wanted to take their families to Turkey for safety. Many noted that they wanted to keep their children  
275 safe, and in Syria, it was impossible.

276 *I cannot live with my children under these circumstances. I saw what happened in Homs. I saw what*  
277 *happened in Deraa...using guns and aeroplanes... I felt this will happen in my area. This happened*  
278 *for 2-3 days [after leaving] my home. (health service manager, male)*

279 Participants were told that if a family member was arrested, the entire family would be investigated,  
280 and any suspected anti-government views or actions could lead to family-wide punishments.

1  
2  
3 281 *After the second time detention [by GoS] my family said: "Leave the country now". I left. My family*  
4  
5 282 *was afraid that I will go to jail again. Four days after I had left, they took my brother and told him,*  
6  
7 283 *"Tell your brother that if we catch him"... (speciality doctor, male)*  
8

9 284 In many cases, the participant was the breadwinner of the family. Therefore, they were concerned  
10  
11 285 about the financial well-being of their family, should they die. One participant mentioned that he  
12  
13 286 would most likely live and work in Syria without a wife and children.

14  
15 287 *My family is dependent on me. Their existence is depending on me and my survival. I don't want to*  
16  
17 288 *cause them danger or die as a martyr, and they lost me. It would be my family that would pay the*  
18  
19 289 *high price. (speciality doctor, male)*  
20

21  
22 290 Some male participants expressed the fear of being conscripted in the Syrian forces. Many  
23  
24 291 participants had witnessed atrocities performed by the GoS, and some had even been detained and  
25  
26 292 tortured. They wanted to avoid becoming part of the military forces, and the only option was to leave.

27  
28 293 *We had to go. I knew that they [the GoS] were after me. I had to leave my studies and leave. I should*  
29  
30 294 *have gone to the army. That's why the regime was after me. (speciality doctor, male)*  
31

32 295 Becoming remarked by ISIS for expressing opposing sentiments or oppressing them in any way was  
33  
34 296 highly dangerous, as many participants noted. Those participants who had fallen in disfavour of the  
35  
36 297 organisation had little option. They had to leave because of the risk of being arrested or even executed.

37  
38 298 *We talked about ISIS that they are not from Syria and we are not accepting their presence here etc.*  
39  
40 299 *Later, my friends told me that ISIS is observing my home. I moved to another area. After this incident,*  
41  
42 300 *one of them [friends] was arrested by ISIS. (specialist doctor, male)*  
43

44  
45 301 Although the participants were not explicitly asked for their ethnic background because of the  
46  
47 302 sensitivity, several of them mentioned their Kurdish roots, the minority in Syria. The Kurdish  
48  
49 303 participants felt that they were targeted explicitly by radical Sunni Muslim NSAGs because of their  
50  
51 304 background.

### 52 53 305 **Violence related to being a HCW**

54

55 306 Most of the participants had personally experienced violence that they considered to be connected  
56  
57 307 with their profession. All thought that their profession made them a target. Participants described their  
58  
59 308 experiences since 2011 in detail. The violence included verbal assaults, beatings, detainment, and  
60

1

2

3 309 torture. They had been shot at or been in an ambulance when assaulted. Some participants described  
4  
5 310 the situation when they had been in a healthcare facility at the time of the aerial bombardments by  
6  
7 311 GoS and later by Russia.

8

9 312 *This [name retracted] hospital was targeted by a Russian airstrike. One of my friends died in this*  
10  
11 313 *airstrike, the doctor [name retracted]. I'm very sad about him. (speciality doctor, male)*

12

13

14 314 All participants described the violence that their colleagues had experienced, and those were similar  
15  
16 315 to their own. Some colleagues and co-workers were arrested, had gone missing, and were never seen  
17  
18 316 again. Some were later found dead with marks of severe abuse. Participants had also lost their  
19  
20 317 colleagues in airstrikes.

20

21

22 318 *I have seen colleagues killed in front of my eyes. In [place retracted] was a doctor, and she was taken.*

23

24 319 *They [the unknown perpetrator] took her. Later she was found raped and dead. (speciality doctor,*  
25  
26 320 *male)*

26

27

28 321 Participants saw and experienced their colleagues being humiliated and occasionally arrested in the  
29  
30 322 hospitals, sometimes in the middle of medical operations.

31

32

33 323 *[Name retracted] was like a brother. He got arrested in a real, humiliating way. He was changing*  
34  
35 324 *the bandages to the patient. They [GoS] took him from the room. [They] covered his face in front of*  
36  
37 325 *the staff of the hospital. They didn't let anyone talk to him or ask where [GoS] were taking him.*

37

38

38 326 (speciality doctor, male)

39

40 327 Some participants decided to leave once their colleagues had been arrested, gone missing, or found  
41  
42 328 dead. The fear of being caught by the GoS was a significant reason to escape. In addition, many  
43  
44 329 participants were afraid that their captured colleagues were giving up their name under torture.

45

46

46 330 However, a relationship marked by solidarity existed amongst the professionals.

47

48

48 331 *One of my colleagues was arrested. Under a lot of pressure, they have the methods that you talk. He*  
49  
50 332 *mentioned my name. I had to pay to get out of Syria and out of Aleppo. I left everything behind.*

51

52

52 333 (general practitioner, male)

53

54 334 Additionally, as HCWs, participants were concerned about the roadblocks. Crossing them was  
55  
56 335 considered stressful when travelling for work. Participants described the incidents on the checkpoints.

57

58 336 Sometimes they were stopped for extended periods and inspections, sometimes detained. Participants  
59  
60 337 considered that this was due to their profession.

60

1  
2  
3 338  
4

5 339 *At the [GoS] checkpoints, many doctors were arrested. One orthopaedic and his wife. This doctor*  
6 *had no problems [with GoS], and he had done nothing. He was taken from the roadblock. He was in*  
7 340 *prison for five months. His wife had to pay 800 000 Syrian pounds to get him away. This was in 2013.*

8 341  
9  
10 342 (general practitioner, male)

11  
12  
13 343 Hospitals became threatening due to constant military and GoS presence, according to participants.  
14 344 Armed soldiers were seen as intimidating and reduced the willingness of HCWs to show up at work,  
15 345 as many participants depicted. In addition, one of the participants described having seen sharpshooters  
16 346 on hospital roofs aiming at people and even shooting them.

17  
18  
19  
20  
21 347 *In the hospital where I worked, the situation changed. It started to look like a military base. The*  
22 348 *soldiers were going in and out with their weapons. Most doctors and other healthcare workers did*  
23 349 *not come to work because they were afraid of the soldiers with guns. They could cause you*  
24 350 *troubles for no reason.* (speciality doctor, male)

25  
26  
27  
28  
29 351 Many participants described that in many cases, when the governmental forces arrived to investigate  
30 352 the hospital, HCWs warned their colleagues in danger of being arrested. The warnings allowed them  
31 353 to avoid capture. However, this was very dangerous, and in several cases, the participants reported  
32 354 that GoS had arrested their colleagues.

33  
34  
35  
36 355 *I heard that my name was asked in the hospital I am working. I felt that I was in danger. I fled out of*  
37 356 *the country. When someone is asking about you in Syria, that is the mukhabarat [security service].*  
38 357 *My friend was arrested in front of the hospital. One week before his arrest, they start to ask about*  
39 358 *him. One nurse in the hospital called me and [said] "There is someone from the military department*  
40 359 *and asked about you".* (general practitioner, male)

41  
42  
43  
44  
45  
46 360 The opposite was also confirmed, as some participants remembered. A fraction of the workers sided  
47 361 with the GoS. They could spy on their colleagues, record their conversations, and then turn them in.  
48 362 Due to strict internal monitoring, anti-government discussions, even in private settings, could be  
49 363 carried to government officials according to participants.

50  
51  
52  
53  
54 364 *They [security forces] opened the phone, and there were conversations between doctors. Some doctor*  
55 365 *or nurse have recorded conversations and then give them to the security service. We were arrested*  
56 366 *for 24- 28 hours.* (speciality doctor, male)



1  
2

3 367 Some participants said that they were persuaded to abandon their country only after being personally  
4  
5 368 threatened or imprisoned – some for extended periods.

6

7  
8 369 *After [released from the prison after six months], another intelligence department [officer] came to*  
9  
10 370 *my house. They were looking for me. They were asking for my house - again. I left Aleppo for*  
11 371 *Turkey. (speciality doctor, male)*

12

13

14 372 A few years after the beginning of the conflict, other warring parties started causing problems for  
15  
16 373 HCWs. The participants considered ISIS as the most significant threat after the GoS.

17

18 374 *ISIS arrested me. It was scary in 2014 in Tel Abyad. For seven hours, then they let me leave. This*  
19  
20 375 *was the main reason I decided to leave Syria. After being interrogated by ISIS, I decided that even I*  
21  
22 376 *have studied for 12 years, I am not ready for this, getting 1000 to 2000 USD per month [salary].*  
23  
24 377 *Those seven hours they interrogated me was a changing moment in my life. It was the first time when*  
25 378 *something like that happened to me. Those seven hours felt like seven years. (speciality doctor, male)*

26

27

28 379 HCWs are more likely to encounter events and become victims of mistreatment due to the very nature  
29  
30 380 of their profession. Many participants were forced to witness the abuse of civilians while practising  
31  
32 381 their work. The participants describe having seen people subjected to violence and taken by GoS.  
33 382 Many of those persons imprisoned had been tortured before they were brought to hospitals.

34

35

36 383 *We have seven patients taken by intelligence. We were receiving patients from the intelligence after*  
37  
38 384 *torturing in prison to cure them. Sometimes they bring dead bodies and throw them in front of us.*  
39 385 *Sometimes they took patients from the hospitals. Somebody who went to protest was shot or stabbed*  
40  
41 386 *by Shabbiha [pro-government militia]. He [patient] came with his family or ambulance or himself to*  
42  
43 387 *the hospital to take treatment. They knew [GoS] that he was there, and they would come. Even before*  
44 388 *treating him. Or while treating him. I know many cases. (speciality doctor, male)*

45

46

47 389

48

49

50 390

51

52

53 391

54

55 392

56 393

57

58 394

59

60 395

## DISCUSSION

To our knowledge, this is the first research to examine the reasons why Syrian HCWs migrate from the conflict-affected country. This qualitative study is based on semi-structured interviews of the 20 Syrian HCWs who left the country after 2011. In previous studies from on conflict settings, avoiding the violence of war has not been the HCWs' sole reason to leave; financial issues and concerns regarding education were also mentioned as reasons for leaving. [21,22] However, we found no

1  
2  
3 396 HCWs indicating either factor as the primary cause for leaving. Doocy et al.[25] state that the choice  
4  
5 397 to go is a sum of many different factors. Our study suggested that all reasons to leave Syria were  
6  
7 398 related to security issues. It appears that the ever-present violence and complexity of the war in Syria  
8  
9 399 superseded all other concerns.

10  
11 400 HCWs considered their profession to be a reason for the violence they experienced. The GoS seemed  
12  
13 401 to target HCWs specifically because of their profession. This intentional targeting is in accordance  
14  
15 402 with multiple reports and studies.[7,14,28,29,31,37] The GoS was also responsible for generalised  
16  
17 403 violence and violence related to personal issues. ISIS was primarily accountable for generalised  
18  
19 404 violence and sometimes attacked the participants for their individual actions such as expressing their  
20 405 political opinions.

21  
22  
23 406 Many HCWs had to weigh the lack of prospects and accumulating stress against the equally  
24  
25 407 intimidating challenge of actually trying to leave the country. While some participants had a specific  
26  
27 408 notable trigger event, such as a colleague being detained or killed, many just grew tired of living  
28 409 under constant threat and fear.

29  
30 410 The average participant in this study was a 36-year-old male doctor with a speciality. He was married  
31  
32 411 and a had a family and at least one child. This profile is in accordance with other studies[23–25] that  
33  
34 412 have shown male gender and similar age structure associate with the risk of targeted violence and  
35  
36 413 migration. On the other hand, the need to protect ones family is an important reason to leave. As one  
37 414 of our participants said, he would be working in Syria if he did not have a family. When experienced  
38  
39 415 HCWs leave the country, the remaining personnel are left without sufficient professional expertise,  
40  
41 416 as has happened in Iraq.[1] This reduces the quality of healthcare services and adds to the workload  
42 417 of those staying.[17,31]

43  
44  
45 418 The emotional distress of violence on HCWs is enormous, as noted in the study by Hamid et al. [38].  
46  
47 419 Participants have lost colleagues, friends, and family members. In addition to their experienced  
48  
49 420 traumas, they are most likely to have secondary traumas through witnessing atrocities against  
50  
51 421 civilians while working as HCWs near the front line of war. Despite this, some of our participants  
52 422 were visiting Syria every month for humanitarian work. The motivations for this should be studied  
53  
54 423 more closely because it might help find solutions to get senior HCWs back permanently to Syria now,  
55  
56 424 as the violence starts to show signs of decreasing. The availability of healthcare personnel is one of  
57 425 the central issues in rebuilding civil society. However, finding qualified HCWs is challenging when  
58  
59 426 the majority of them have left the country.[17] Additionally, medical students had to leave their  
60

1  
2  
3  
4  
5  
6  
7  
8  
9  
10  
11  
12  
13  
14  
15  
16  
17  
18  
19  
20  
21  
22  
23  
24  
25  
26  
27  
28  
29  
30  
31  
32  
33  
34  
35  
36  
37  
38  
39  
40  
41  
42  
43  
44  
45  
46  
47  
48  
49  
50  
51  
52  
53  
54  
55  
56  
57  
58  
59  
60

427 undergraduate studies and postgraduation training to flee the violence.[19] These amount to a  
428 significant loss of human capital for the Syrian healthcare system. Restoring both current and future  
429 provision of services to an acceptable level will be highly demanding.

### 430 **Strengths and limitations**

431 The present research is subjected to several limitations. First, while we reached participants from  
432 several different Syrian governorates (Homs, Daraa, Deir Ez-Zour, Raqqa, Hama, Rif Damascus),  
433 most were originally from Aleppo. On the other hand, they had worked in different locations and had  
434 experienced violence in areas under all warring parties. More studies should focus on recruiting  
435 participants from all these areas, especially from those that ISIS had controlled. Many interviewees  
436 considered ISIS as one of the main factors for leaving. Second, the SSM is conducive to selection  
437 bias.[33] We used three different parallel SSM networks to reduce this. Third, the perspectives of  
438 female HCWs are partly missing. Future research should concentrate not only on sex-based violence  
439 but also on the experiences of female HCWs and their reasons for leaving Syria.

441 Obtaining data in a conflict setting, especially first-hand accounts of personal experiences, is  
442 challenging. However, one of the authors is a Syrian HCW who has lived and worked mainly in  
443 NSAG and Kurdish forces-controlled areas. His first-hand knowledge made this study more valuable  
444 and provided a better understanding of the situation in such regions of Syria that researchers generally  
445 have not been able to visit due to severe security risks.

### 447 **CONCLUSION**

448 This research explores in detail why HCWs have left conflict-torn Syria. Our study explains that local  
449 HCWs had no other alternative but to leave their homes and work to protect themselves and their  
450 families. In addition, this study gives a voice to Syrian HCWs who have witnessed horrors of conflict  
451 with extensive destruction.

452 Our interviewees described such acts of violence and attacks against healthcare that may constitute  
453 violations against Geneva Conventions. Thus, these actions might be considered war crimes and  
454 would then require perpetrators to be held accountable.

1  
2  
3 455 A better understanding of this type of forced migration is needed to develop approaches to support  
4  
5 456 HCWs psychologically and practically in a time of war. This study enables creation of actionable  
6  
7 457 protocols of intervention diminishing or prevent similar future events.  
8  
9

10 458  
11  
12 459 **ACKNOWLEDGEMENTS** We are thankful for all those Syrian health care workers who trusted us  
13  
14 460 and shared their experience and memories. We also thank the Foundation of the Finnish Institute in  
15  
16 461 the Middle East for supporting AK and MH field trip to Turkey. We thank Alfred Kordelin  
17  
18 462 Foundation, for supporting AK.  
19

20 463 **COMPETING INTEREST** No competing interests.  
21  
22

23 464 **FUNDING** This work was supported by the Foundation of the Finnish Institute in the Middle East.  
24  
25 465 In addition, the Alfred Kordelin Foundation [grant number 200218] supported AK's work.  
26  
27

28 466 **DISCLAIMER** the Foundation of the Finnish Institute in the Middle East or The Alfred Kordelin  
29  
30 467 Foundation was not involved in any step of this research. The notions and views are those of the  
31  
32 468 authors.  
33  
34

### 35 469 **AUTHORS' CONTRIBUTIONS**

36  
37

38 470 AK, MH, HJ, and JK designed and conceptualised the study. AK, MH and OA, coordinated and  
39  
40 471 carried out data collection. AK and JP coded the data. AK, OA, and JP analysed and interpreted the  
41  
42 472 data. AK led manuscript writing with contributions from OA, JP, MH, HJ and JK. All authors  
43  
44 473 reviewed and accepted the final manuscript.  
45

46 474 **Competing interests** No competing interests.  
47  
48

49 475 **Patient consent** No patients or members of the public were involved in the conduct of this research  
50

51 476 **Ethics approval** An ethical permit for the study was applied for and obtained from the University of  
52  
53 477 Eastern Finland Committee on Research Ethics in 2016.  
54

55 478 **Provenance and peer review** Not commissioned; externally peer-reviewed.  
56

57 479 **Data sharing statement** Data can be obtained from the corresponding author.  
58  
59  
60

1  
2  
3 480  
4  
5  
6 481  
7  
8  
9 482  
10  
11 483  
12 484  
13  
14  
15 485  
16 486  
17  
18 487  
19  
20 488  
21  
22 489  
23  
24 490  
25  
26 491  
27  
28 492  
29  
30 493  
31 494  
32  
33 495  
34  
35 496  
36  
37 497  
38  
39 498  
40  
41 499  
42  
43 500  
44  
45 501  
46 502  
47  
48 503  
49  
50 504  
51  
52 505  
53  
54 506  
55  
56 507  
57  
58 508  
59  
60 509

## REFERENCES

- 1 Burnham G, Malik S, Al-Shibli A, *et al.* Understanding the impact of conflict on health services in Iraq: Information from 401 Iraqi refugee doctors in Jordan. *Int J Health Plann Manage* 2012;**27**:e51-64. doi:10.1002/hpm.1091
- 2 Baker A. Syria's Health Crisis Spirals As Doctors Flee. Time. 2014.<https://time.com/3968/syrias-health-crisis-spirals-as-doctors-flee/> (accessed 15 Jun 2020).
- 3 Blanchet K, Abbara A, M.Fouad F, *et al.* The effects of conflict on Syria's health system and human resources for health. *World Health Popul* 2016;**16**:87-95.
- 4 Safeguarding Health in Conflict Coalition (SHCC). No Respite: Violence against Health Care in Conflict. 2021.
- 5 Druce P, Bogatyreva E, Siem FF, *et al.* Approaches to protect and maintain health care services in armed conflict - Meeting SDGs 3 and 16. *Confl Health* 2019;**13**. doi:10.1186/s13031-019-0186-0
- 6 Friedrich MJ. Human Rights Report Details Violence Against Health Care Workers in Bahrain. *JAMA* 2011;**306**:475-6. doi:10.1001/jama.2011.1091
- 7 Fouad FM, Sparrow A, Tarakji A, *et al.* Health workers and the weaponisation of health care in Syria: a preliminary inquiry for The Lancet-American University of Beirut Commission on Syria. *Lancet*. 2017;**390**:2516-26. doi:10.1016/S0140-6736(17)30741-9
- 8 Physicians for Human Rights. A physician's ethical responsibility to provide care during time of war is identical to that during time of peace. 2020.<https://phr.org/issues/health-under-attack/medical-neutrality/> (accessed 26 May 2020).
- 9 Amnesty International. Health crisis: Syrian government targets the wounded and health workers. London: 2011.
- 10 Human Rights Council. Human rights situations that require the Council's attention: Assault on medical care in Syria. 2013.
- 11 ICRC. Protocol I (51) Protection of the civilian population. In: *Protocol Additional to the Geneva Conventions of 12 August 1949, and relating to the Protection of Victims of International Armed Conflicts (Protocol I), Entry into force 7 December 1979*. 1977.

1

2

3 510 12 Médecins Sans Frontières. MSF-Analysis. Treating Terrorists. 2015.[https://msf-](https://msf-analysis.org/new-treating-terrorists/)  
4 analysis.org/new-treating-terrorists/ (accessed 23 May 2020).

6

7 512 13 Physicians for Human Rights. Medical Personnel Are Targeted in Syria.  
8 2020.<https://phr.org/our-work/resources/medical-personnel-are-targeted-in-syria/> (accessed 9  
9 513 Feb 2020).  
10 514

12

13 515 14 Koteiche R, Murad S, Heisler M. My Only Crime Was That I Was a Doctor. Physicians  
14 516 Hum. Rights. 2019.[https://phr.org/our-work/resources/my-only-crime-was-that-i-was-a-](https://phr.org/our-work/resources/my-only-crime-was-that-i-was-a-doctor/#phr_toc_0)  
15 517 doctor/#phr\_toc\_0 (accessed 24 Apr 2020).

17

18 518 15 The Safeguarding Health in Conflict Coalition. Health workers at risk: Violence against  
19 519 health care. 2020.<https://www.safeguardinghealth.org/sites/shcc/files/SHCC2020final.pdf>  
20 520 (accessed 10 Jun 2020).  
21 521

23

24 521 16 Kallström A, Häkkinen M, Al-Abdulla O, *et al.* Caught in crossfire: health care workers'  
25 522 experiences of violence in Syria. *Conflict, Heal Surviv* Published Online First: 2021.  
26 523 doi:<https://doi.org/10.1080/13623699.2021.1889654>

28

29 524 17 Fardousi N, Douedari Y, Howard N. Healthcare under siege: a qualitative study of health-  
30 525 worker responses to targeting and besiegement in Syria. *BMJ Open* 2019;**9**:e029651.  
31 526 doi:10.1136/bmjopen-2019-029651  
32 527

34

35 527 18 United Nations Office for the Coordination of Humanitarian Affairs. Syria anniversary press  
36 528 release. 2020. [https://reliefweb.int/sites/reliefweb.int/files/resources/USG Lowcock Syria](https://reliefweb.int/sites/reliefweb.int/files/resources/USG%20Lowcock%20Syria%20Anniversary%20PR_06032020.pdf)  
37 529 Anniversary PR\_06032020.pdf  
38 530

40

41 530 19 Abbara A, Orcutt M, Gabbar O. Syria's lost generation of doctors. *BMJ Br Med J* 2015;**350**.

42

43 531 20 Natasha H, Hosain M, Ho L. Effects of conflict on health. In: *Conflict and Health*. Berkshire:  
44 532 : Open University Press. McGraw Hill Education 2012. 25–31.

46

47 533 21 Lafta R, Al-Ani W, Dhiaa S, *et al.* Perceptions, experiences and expectations of Iraqi medical  
48 534 students. *BMC Med Educ* 2018;**18**:53. doi:10.1186/s12909-018-1156-8  
49 535

50

51 535 22 Bou-Karroum L, Daou KN, Nomier M, *et al.* Health Care Workers in the setting of the 'Arab  
52 536 Spring': A scoping review for the Lancet-AUB Commission on Syria. *J Glob Health*  
53 537 2019;**9**:010402. doi:10.7189/jogh.09.010402  
54 538

55

56 538 23 Kronfol NM, Sibai AM, Rafeh N. The impact of civil disturbances on the migration of  
57 539 physicians: The case of Lebanon. *Med Care* 1992;**5**:29–35. doi:10.1097/00005650-  
58 540 199203000-00003  
59 540

- 1  
2  
3 541 24 Burnham G, Doocy S, Lafta R. Doctors leaving 12 tertiary hospitals in Iraq, 2004–2007. *Soc*  
4 *Sci Med* 2009;**69**:172–7. doi:10.1016/j.socscimed.2009.05.021  
5 542  
6  
7 543 25 Doocy S, Malik S, Burnham G. Experiences of Iraqi doctors in Jordan during conflict and  
8 factors associated with migration. *Am J Disaster Med* 2010;**5**:41–7.  
9 544  
10 545 doi:10.5055/ajdm.2010.0005  
11  
12 546 26 Al-Khalisi N. The Iraqi medical brain drain: A cross-sectional study. *Int J Heal Serv*  
13 547 2013;**43**:363–78. doi:10.2190/HS.43.2.j  
14  
15 548 27 Burnham GM, Lafta R, Doocy S. Doctors leaving 12 tertiary hospitals in Iraq, 2004–2007.  
16 549 *Soc Sci Med* 2009;**69**:172–7. doi:10.1016/j.socscimed.2009.05.021  
17  
18 550 28 Elamein M, Bower H, Valderrama C, *et al.* Attacks against health care in Syria, 2015–16:  
19 551 results from a real-time reporting tool. *Lancet* Published Online First: 2017.  
20 552 doi:10.1016/S0140-6736(17)31328-4  
21  
22 553 29 Ri S, Blair AH, Kim CJ, *et al.* Attacks on healthcare facilities as an indicator of violence  
23 554 against civilians in Syria: An exploratory analysis of open-source data. *PLoS One* Published  
24 555 Online First: 2019. doi:10.1371/journal.pone.0217905  
25  
26 556 30 Wong CH, Chen CYT. Ambulances under siege in Syria. *BMJ Glob Heal* 2018;**3**.  
27 557 doi:10.1136/bmjgh-2018-001003  
28  
29 558 31 Footer KHA, Clouse E, Reyes D, *et al.* Qualitative accounts from Syrian health professionals  
30 559 regarding violations of the right to health, including the use of chemical weapons, in  
31 560 opposition-held Syria. *BMJ Open* 2018;**8**.  
32  
33 561 32 International Labour Office. International Standard Classification of Occupations Structure,  
34 562 group definitions and correspondence tables. ISCO-08. Volume I. 2012.  
35 563 [https://www.ilo.org/wcmsp5/groups/public/---dgreports/---dcomm/---](https://www.ilo.org/wcmsp5/groups/public/---dgreports/---dcomm/---publ/documents/publication/wcms_172572.pdf)  
36 564 [publ/documents/publication/wcms\\_172572.pdf](https://www.ilo.org/wcmsp5/groups/public/---dgreports/---dcomm/---publ/documents/publication/wcms_172572.pdf)  
37 565  
38 566 33 Kaplan CD, Korf D, Sterk C. Temporal and social contexts of heroin-using population: An  
39 567 illustration of the snowball sampling. *J Ment Nerv Disord* 1987;**9**:566–74.  
40 568 doi:10.1097/00005053-198709000-00009  
41 569  
42 570 34 DeJonckheere M, Vaughn LM. Semistructured interviewing in primary care research: a  
43 571 balance of relationship and rigour. *Fam Med Community Heal* 2019;**7**:e000057.  
44 572 doi:10.1136/fmch-2018-000057  
45  
46 573 35 World Health Organization. World report on violence and health: summary. Geneva: 2002.  
47  
48  
49  
50  
51  
52  
53  
54  
55  
56  
57  
58  
59  
60

1  
2  
3  
4  
5  
6  
7  
8  
9  
10  
11  
12  
13  
14  
15  
16  
17  
18  
19  
20  
21  
22  
23  
24  
25  
26  
27  
28  
29  
30  
31  
32  
33  
34  
35  
36  
37  
38  
39  
40  
41  
42  
43  
44  
45  
46  
47  
48  
49  
50  
51  
52  
53  
54  
55  
56  
57  
58  
59  
60

- 572 36 World Health Organization. Attacks on health care. 2019.[https://www.who.int/news-room/q-](https://www.who.int/news-room/q-a-detail/attacks-on-health-care)  
573 a-detail/attacks-on-health-care (accessed 25 May 2020).
- 574 37 Tammi I-M. Politicians, pathogens, and other threats to aid workers: a material semiotic  
575 analysis of violence against health care in the Syrian conflict. *Crit Stud Secur* 2021;:1–13.  
576 doi:10.1080/21624887.2021.1925496
- 577 38 Hamid A, Scior K, Williams AC de C. Qualitative accounts from Syrian mental health  
578 professionals: shared realities in the context of conflict and forced displacement. *BMJ Open*  
579 2020;**10**:e034291. doi:10.1136/bmjopen-2019-034291

For peer review only



## COREQ (COnsolidated criteria for REporting Qualitative research) Checklist

A checklist of items that should be included in reports of qualitative research. You must report the page number in your manuscript where you consider each of the items listed in this checklist. If you have not included this information, either revise your manuscript accordingly before submitting or note N/A.

| Topic                                          | Item No. | Guide Questions/Description                                                                                                                              | Reported on Page No. |
|------------------------------------------------|----------|----------------------------------------------------------------------------------------------------------------------------------------------------------|----------------------|
| <b>Domain 1: Research team and reflexivity</b> |          |                                                                                                                                                          |                      |
| <i>Personal characteristics</i>                |          |                                                                                                                                                          |                      |
| Interviewer/facilitator                        | 1        | Which author/s conducted the interview or focus group?                                                                                                   |                      |
| Credentials                                    | 2        | What were the researcher's credentials? E.g. PhD, MD                                                                                                     |                      |
| Occupation                                     | 3        | What was their occupation at the time of the study?                                                                                                      |                      |
| Gender                                         | 4        | Was the researcher male or female?                                                                                                                       |                      |
| Experience and training                        | 5        | What experience or training did the researcher have?                                                                                                     |                      |
| <i>Relationship with participants</i>          |          |                                                                                                                                                          |                      |
| Relationship established                       | 6        | Was a relationship established prior to study commencement?                                                                                              |                      |
| Participant knowledge of the interviewer       | 7        | What did the participants know about the researcher? e.g. personal goals, reasons for doing the research                                                 |                      |
| Interviewer characteristics                    | 8        | What characteristics were reported about the interviewer/facilitator? e.g. Bias, assumptions, reasons and interests in the research topic                |                      |
| <b>Domain 2: Study design</b>                  |          |                                                                                                                                                          |                      |
| <i>Theoretical framework</i>                   |          |                                                                                                                                                          |                      |
| Methodological orientation and Theory          | 9        | What methodological orientation was stated to underpin the study? e.g. grounded theory, discourse analysis, ethnography, phenomenology, content analysis |                      |
| <i>Participant selection</i>                   |          |                                                                                                                                                          |                      |
| Sampling                                       | 10       | How were participants selected? e.g. purposive, convenience, consecutive, snowball                                                                       |                      |
| Method of approach                             | 11       | How were participants approached? e.g. face-to-face, telephone, mail, email                                                                              |                      |
| Sample size                                    | 12       | How many participants were in the study?                                                                                                                 |                      |
| Non-participation                              | 13       | How many people refused to participate or dropped out? Reasons?                                                                                          |                      |
| <i>Setting</i>                                 |          |                                                                                                                                                          |                      |
| Setting of data collection                     | 14       | Where was the data collected? e.g. home, clinic, workplace                                                                                               |                      |
| Presence of non-participants                   | 15       | Was anyone else present besides the participants and researchers?                                                                                        |                      |
| Description of sample                          | 16       | What are the important characteristics of the sample? e.g. demographic data, date                                                                        |                      |
| <i>Data collection</i>                         |          |                                                                                                                                                          |                      |
| Interview guide                                | 17       | Were questions, prompts, guides provided by the authors? Was it pilot tested?                                                                            |                      |
| Repeat interviews                              | 18       | Were repeat interviews carried out? If yes, how many?                                                                                                    |                      |
| Audio/visual recording                         | 19       | Did the research use audio or visual recording to collect the data?                                                                                      |                      |
| Field notes                                    | 20       | Were field notes made during and/or after the interview or focus group?                                                                                  |                      |
| Duration                                       | 21       | What was the duration of the interviews or focus group?                                                                                                  |                      |
| Data saturation                                | 22       | Was data saturation discussed?                                                                                                                           |                      |
| Transcripts returned                           | 23       | Were transcripts returned to participants for comment and/or                                                                                             |                      |

| Topic                                  | Item No. | Guide Questions/Description                                                                                                        | Reported on Page No. |
|----------------------------------------|----------|------------------------------------------------------------------------------------------------------------------------------------|----------------------|
|                                        |          | correction?                                                                                                                        |                      |
| <b>Domain 3: analysis and findings</b> |          |                                                                                                                                    |                      |
| <i>Data analysis</i>                   |          |                                                                                                                                    |                      |
| Number of data coders                  | 24       | How many data coders coded the data?                                                                                               |                      |
| Description of the coding tree         | 25       | Did authors provide a description of the coding tree?                                                                              |                      |
| Derivation of themes                   | 26       | Were themes identified in advance or derived from the data?                                                                        |                      |
| Software                               | 27       | What software, if applicable, was used to manage the data?                                                                         |                      |
| Participant checking                   | 28       | Did participants provide feedback on the findings?                                                                                 |                      |
| <i>Reporting</i>                       |          |                                                                                                                                    |                      |
| Quotations presented                   | 29       | Were participant quotations presented to illustrate the themes/findings?<br>Was each quotation identified? e.g. participant number |                      |
| Data and findings consistent           | 30       | Was there consistency between the data presented and the findings?                                                                 |                      |
| Clarity of major themes                | 31       | Were major themes clearly presented in the findings?                                                                               |                      |
| Clarity of minor themes                | 32       | Is there a description of diverse cases or discussion of minor themes?                                                             |                      |

Developed from: Tong A, Sainsbury P, Craig J. Consolidated criteria for reporting qualitative research (COREQ): a 32-item checklist for interviews and focus groups. *International Journal for Quality in Health Care*. 2007. Volume 19, Number 6: pp. 349 – 357

**Once you have completed this checklist, please save a copy and upload it as part of your submission. DO NOT include this checklist as part of the main manuscript document. It must be uploaded as a separate file.**
